# Supplementary material for: Minimum acceptable diet and associated factors among infants and young children aged 6–23 months in Amhara region, Central Ethiopia: community-based cross-sectional study
Source: PubMed Central journal article supplement — BMJ Open. 2021 May 10;11(5):e044284. doi: 10.1136/bmjopen-2020-044284 (PMC8112428; doi:10.1136/bmjopen-2020-044284), 2021-05-10
Supplement: bmjopen-2020-044284.draft_revisions.pdf [file bmjopen-2020-044284.draft_revisions.pdf]

# BMJ Open

BMJ Open is committed to open peer review. As part of this commitment we make the peer review history of every article we publish publicly available.

When an article is published we post the peer reviewers' comments and the authors' responses online. We also post the versions of the paper that were used during peer review. These are the versions that the peer review comments apply to.

The versions of the paper that follow are the versions that were submitted during the peer review process. They are not the versions of record or the final published versions. They should not be cited or distributed as the published version of this manuscript.

BMJ Open is an open access journal and the full, final, typeset and author-corrected version of record of the manuscript is available on our site with no access controls, subscription charges or pay-per-view fees (<http://bmjopen.bmj.com>).

If you have any questions on BMJ Open's open peer review process please email [info.bmjopen@bmj.com](mailto:info.bmjopen@bmj.com)

# BMJ Open

## Minimum Acceptable Diet and Associated Factors among Infants and Young Children aged 6-23 months in Debre Birhan Town, Ethiopia: Community-Based Cross-Sectional Study

|                               |                                                                                                                                                                                                                                                                                                                                                                                                  |
|-------------------------------|--------------------------------------------------------------------------------------------------------------------------------------------------------------------------------------------------------------------------------------------------------------------------------------------------------------------------------------------------------------------------------------------------|
| Journal:                      | <i>BMJ Open</i>                                                                                                                                                                                                                                                                                                                                                                                  |
| Manuscript ID                 | bmjopen-2020-044284                                                                                                                                                                                                                                                                                                                                                                              |
| Article Type:                 | Original research                                                                                                                                                                                                                                                                                                                                                                                |
| Date Submitted by the Author: | 28-Aug-2020                                                                                                                                                                                                                                                                                                                                                                                      |
| Complete List of Authors:     | Molla, Abebaw; Mizan-Tepi University, Egata, Gudina ; Addis Ababa University College of Health Sciences, Public health<br>Getacher, Lemma ; Debre Berhan University, Public Health, Nutrition<br>Kebede , Bezie; Mizan-Tepi University<br>Sayih, Alemayehu; Mizan-Tepi University<br>Arega, Mikyas; Debre Berhan University, Public Health, Nutrition<br>Bante, Agegnehu; Arba Minch University, |
| Keywords:                     | NUTRITION & DIETETICS, Community child health < PAEDIATRICS, Anaemia < HAEMATOLOGY, PUBLIC HEALTH                                                                                                                                                                                                                                                                                                |
|                               |                                                                                                                                                                                                                                                                                                                                                                                                  |

SCHOLARONE™  
Manuscripts

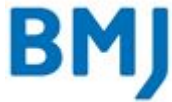

I, the Submitting Author has the right to grant and does grant on behalf of all authors of the Work (as defined in the below author licence), an exclusive licence and/or a non-exclusive licence for contributions from authors who are: i) UK Crown employees; ii) where BMJ has agreed a CC-BY licence shall apply, and/or iii) in accordance with the terms applicable for US Federal Government officers or employees acting as part of their official duties; on a worldwide, perpetual, irrevocable, royalty-free basis to BMJ Publishing Group Ltd ("BMJ") its licensees and where the relevant Journal is co-owned by BMJ to the co-owners of the Journal, to publish the Work in this journal and any other BMJ products and to exploit all rights, as set out in our [licence](#).

The Submitting Author accepts and understands that any supply made under these terms is made by BMJ to the Submitting Author unless you are acting as an employee on behalf of your employer or a postgraduate student of an affiliated institution which is paying any applicable article publishing charge ("APC") for Open Access articles. Where the Submitting Author wishes to make the Work available on an Open Access basis (and intends to pay the relevant APC), the terms of reuse of such Open Access shall be governed by a Creative Commons licence – details of these licences and which [Creative Commons](#) licence will apply to this Work are set out in our licence referred to above.

Other than as permitted in any relevant BMJ Author's Self Archiving Policies, I confirm this Work has not been accepted for publication elsewhere, is not being considered for publication elsewhere and does not duplicate material already published. I confirm all authors consent to publication of this Work and authorise the granting of this licence.

1  
2  
3 **1 Minimum Acceptable Diet and Associated Factors among Infants and Young Children aged**  
4  
5 **2 6-23 months in Debre Birhan Town, Ethiopia: Community-Based Cross-Sectional Study**  
6  
7

8 3 Abebaw Molla<sup>1\*</sup>, Gudina Egata<sup>2</sup>, Lemma Getacher<sup>3</sup>, Bezie Kebede<sup>4</sup>, Alemayehu Sayih<sup>1</sup>, Mikyas  
9 4 Arega<sup>5</sup>, Agegnhu Bante<sup>6</sup>  
10  
11

12  
13 <sup>1</sup>Department of Nursing, College of Health Sciences, Mizan Tepi University, Ethiopia  
14

15 <sup>2</sup>School of Public Health, College of Health and Medical Sciences, Haramaya University, Ethiopia  
16

17 <sup>3</sup>Department of Public Health, College of Medicine and Health Sciences, Debre Berhan University,  
18 Ethiopia  
19  
20

21 <sup>4</sup>Department of Pharmacy, College of Health Sciences, Mizan-Tepi University, Ethiopia  
22

23 <sup>5</sup>Department of Midwifery, College of Medicine and Health Sciences, Debre Berhan University,  
24 Ethiopia  
25  
26

27 <sup>6</sup>School of Nursing, College of Medicine and Health Sciences, Arba Minch University, Ethiopia  
28  
29

30  
31 **Author email address**  
32

33  
34 Abebaw Molla: [abebawtsehay1@gmail.com](mailto:abebawtsehay1@gmail.com), Gudina Egata: [gudina\\_egata@yahoo.com](mailto:gudina_egata@yahoo.com), Lemma  
35

36 Getacher: [lemmagetacher@gmail.com](mailto:lemmagetacher@gmail.com), Bezie Kebede: [beza.kebede21@gmail.com](mailto:beza.kebede21@gmail.com), Alemayehu  
37

38 Sayih: [Alex.sayihalem2012@gmail.com](mailto:Alex.sayihalem2012@gmail.com), Mikyas Arega: [miky24real@gmail.com](mailto:miky24real@gmail.com), Agegnhu  
39

40 Bante: [agegnehubante@gmail.com](mailto:agegnehubante@gmail.com).  
41

42  
43 \* Corresponding author  
44

45 E-mail address: [abebawtsehay1@gmail.com](mailto:abebawtsehay1@gmail.com) (AM)  
46

47 Institutional email: [abebawmolla@mtu.edu.et](mailto:abebawmolla@mtu.edu.et)  
48  
49

50 **Word count: 2978**  
51

52 **Abstract**  
53  
54  
55  
56  
57  
58  
59  
60

1  
2  
3 23 **Objective:** The study aimed to assess the prevalence of minimum acceptable diet and associated  
4  
5 24 factors

6  
7  
8 25 **Design:** A community-based cross-sectional study design was used.  
9

10  
11 26 **Setting:** Three randomly selected urban kebeles in Debre Berhan Town, Ethiopia.  
12

13  
14 27 **Participants:** a total of 531 infants and young children-mother/caregiver pair participated in the  
15  
16 28 study. Cluster sampling was used to select child –mother pair by considering Kebeles (smallest  
17  
18 29 administrative unit) as clusters, and three kebeles were selected randomly. Odds ratio with 95%  
19  
20 30 CI was estimated to measure the strength of association between minimum acceptable diet and the  
21  
22 31 predictor variables. The level of Statistical significance was declared at  $p < 0.05$ .  
23  
24

25  
26 32 **Primary outcome:** prevalence of minimum acceptable diet and its associated factors.  
27

28  
29 33 **Results:** The overall prevalence of minimum acceptable diet was 168 [31.6 %, 95% CI: (27.7,  
30  
31 34 35.2)]. The proportion of minimum acceptable diet was higher among female 101 (38.7%).  
32  
33 35 Cereals, roots and tubers were the most consumed food groups (91.1%) and vitamin A was least  
34  
35 36 consumed food group (22.4%). Parent education, growth monitoring utilization, child age, child  
36  
37 37 history of illness, health extension worker advice and practice home garden were significantly  
38  
39 38 associated with minimum acceptable diet.  
40  
41

42  
43 39 **Conclusion:** Generally the prevalence of minimum acceptable diet standard was very low. This  
44  
45 40 inappropriate complementary feeding practice implies poor child growth and development, high  
46  
47 41 risk of malnutrition and micronutrient deficiency. Therefore, interventions in the first 1000 days  
48  
49 42 targeted less educated parents, age-appropriate feeding practices and feeding during illness should  
50  
51 43 be emphasized. The government also encourages child growth monitoring, community based  
52  
53 44 health and nutrition services and urban agricultural practices.  
54  
55  
56  
57

1  
2  
3  
4 45 **Key Words:** Associated factors, Debre Berhan Town, Ethiopia, infants and young Children  
5  
6 46 aged 6-23 months, Minimum acceptable diet  
7

## 8 9 47 **Article summary**

### 10 11 12 48 **Strength and limitation of the study**

- 15 49 • This study conducted at community level which is generalizable.
- 16  
17 50 • Relatively the study used large sample size to increase study power.
- 18  
19 51 • Use multivariate analyses to control possible confounders.
- 20  
21 52 • First limitation may be seasonal variation, social desirability bias and recall bias.
- 22  
23 53 • Secondly, the study used cross sectional study design doesn't show temporal relationship.  
24  
25  
26  
27

### 28 54 **Introduction**

29  
30  
31 55 Malnutrition is continued as the global public health challenge and can touches all populations  
32  
33 56 groups. More, under-five children, pregnant and lactating women, adolescents,  
34  
35 57 immunocompromised and low economic class have more risk of malnutrition [1, 2]. Malnutrition  
36  
37 58 is a major cause of mortality, disability and increase in non-communicable diseases. Globally,  
38  
39 59 malnutrition associated with under-five deaths surpasses 9 million, of which 70% occurs among  
40  
41 60 infants. Undernutrition also cause for fetal growth restriction and is attributed to one-fourth  
42  
43 61 neonatal death [3-6]. Poor nutrition during critical periods has short-term and long-lasting  
44  
45 62 irreversible health consequences. Malnutrition reduces; mental development, physical growth,  
46  
47 63 scholastic achievement and adulthood productivity. It also lessens immune system and increase  
48  
49 64 risk of infection, morbidity and mortality [1, 5-8]. Inappropriate nutrition affects human resources  
50  
51  
52  
53  
54  
55  
56  
57  
58  
59  
60

1  
2  
3 65 development, economic growth and development. Good nutrition has lifelong positive impact on  
4  
5 66 societal health, human capital, nation development and growth [9, 10].  
6

7  
8 67 Minimum acceptable diet (MAD) is the WHO core indicators of infant and young child feeding  
9  
10 68 practices and it is a composite of minimum meal frequency and minimum dietary diversity. MAD  
11  
12 69 defined as a proportion of children aged 6-23 months who received both the minimum number of  
13  
14 70 times and minimum dietary diversity. Receiving MAD is not only prevent from undernutrition,  
15  
16 71 and micronutrient deficiency but also ensure optimal health, growth, and development [11]. A  
17  
18 72 study done in China showed that 41.4% of children aged 6-23 months met MAD [12] and in the  
19  
20 73 Bangladeshi 25% to 44% had minimum meal frequency and 33% to 81% consumed minimum  
21  
22 74 diversified diets [13]. In the Ghana, 29.9 % of children aged 6-23 months receive MAD, while  
23  
24 75 51.4% met the recommended minimum diversified diet [14].  
25  
26  
27  
28

29 76 The Government of Ethiopia launched a revised national nutrition program (NNPII) in 2016 and  
30  
31 77 set a goal to end child undernutrition by 2030. The program was developed to realize Seqota  
32  
33 78 declaration by implementing nutrition sensitive and nutrition specific interventions. Optimum  
34  
35 79 breastfeeding, prevention of micronutrient deficiency and appropriate complementary feeding are  
36  
37 80 the main interventions of NNPII. Different studies that assessing dietary diversity and its  
38  
39 81 associated factors among children aged 6-23 months were conducted in different parts of Ethiopia  
40  
41 82 ([15-23] However, there is a lack of information on the prevalence of minimum acceptable diet  
42  
43 83 and its associated factors. In the 2016 Ethiopia demographic and health survey (EDHS) report, the  
44  
45 84 prevalence of minimum acceptable diet was 7% which is lower than the national target 11% [24]  
46  
47 85 and study done in northwest Ethiopia among orthodox religion followers during fasting season  
48  
49 86 showed that 8.6% of children feed recommended acceptable diet [25]. Thus, identifying factors  
50  
51 87 associated with minimum acceptable diet in diverse culture and socio-economic setting is crucial  
52  
53  
54  
55  
56  
57  
58  
59  
60

1  
2  
3 88 to design interventions to the local context. Hence, this study aimed to assess the prevalence of  
4  
5 89 minimum acceptable diet and associated factors among children aged 6-23 months.  
6  
7

## 8 **Methods**

### 9 **Study design, setting and period**

10  
11  
12 91 A community-based cross-sectional study design was used from February to March 2018 in Debre  
13  
14 92 Berhan Town, Shewa, Ethiopia. The town is located 130 km from Addis Ababa, capital of  
15  
16 93 Ethiopia. In 2017, the town has 88369 total population, nine kebeles, one referral hospital, three  
17  
18 94 health centers and 14 health posts.  
19  
20  
21  
22

### 23 96 **Study participants and Sampling Techniques**

24  
25 97 The source population was all children aged 6–23 months living in Debre Berhan Town and study  
26  
27 98 population was children aged 6-23 months paired with their mothers living in randomly selected  
28  
29 99 Kebeles. Cluster sampling was used to select participants. Considering kebeles (the smallest  
30  
31 100 administrative unit in Ethiopia) as clusters, three kebeles were selected randomly. Sample size was  
32  
33 101 determined using a single population proportion formula with the assumptions: prevalence of  
34  
35 102 minimum acceptable diet 7% [24], 3% margin of error, 95% confidence level, design effect 1.5  
36  
37 103 and 10% for none response. The final calculated sample size was 459, but a total of 577 infants  
38  
39 104 and young children aged 6-23 months were found in randomly selected clusters. Due to the nature  
40  
41 105 of cluster sampling, all infants and young children in the selected cluster were included.  
42  
43  
44  
45

### 46 106 **Data collection methods and tools**

47  
48 107 Socio- demographic data were collected using pretested and structured interviewers administered  
49  
50 108 questionnaires developed from prior studies [26-29]. Ten diploma and two BSc nurses were trained  
51  
52 109 for data collection and supervision. Household food security was assessed using Household Food  
53  
54  
55  
56  
57



1  
2  
3 110 Insecurity Access Scale (HFIAS) developed by the Food and Nutrition Technical Assistance based  
4  
5 111 on the past four weeks recall method [30].  
6

7  
8 112 Infant and young child feeding practices were collected using WHO infant and young child feeding  
9  
10 113 (IYCF) standardized questionnaires based on mother recall of food groups given to the child 24  
11  
12 114 hours prior to data collection [31]. Finally, all foods the child consumed grouped in to seven food  
13  
14 115 groups: (1) grains, roots, and tubers; (2) legumes and nuts; (3) dairy products; (4) flesh foods; (5)  
15  
16 116 eggs; (6) vitamin A-rich fruits and vegetables; and (7) other fruits and vegetables [31].  
17  
18

### 19 117 **Operational definitions**

20  
21 118 **Food secure household:** Household head responds no to all questions item numbers 1-9 or  
22  
23 119 responds yes to question item number 1 and experiences rarely in the past one month [30].  
24  
25

26 120 **Food insecure household:** Household head responds at least yes to question item 1 and  
27  
28 121 experiences sometimes in the past one month [30].  
29

30  
31 122 **Minimum dietary diversity:** The proportion of children aged 6-23 months who received at least  
32  
33 123 four food groups of the seven food groups [31].  
34

35 124 **Minimum meal frequency:** Proportion of breastfed and non-breastfed children aged 6-23 months  
36  
37 125 who received solid, semi-solid or soft foods (including two milk feeds for non-breastfed children)  
38  
39 126 minimum number of times or more the previous day [31].  
40  
41

42 127 **Minimum acceptable diet:** Proportion of children aged 6-23 who received both minimum meal  
43  
44 128 frequency and minimum dietary diversity [31].  
45

46  
47 129 **Timely introduction of complementary feeding:** The child initiated solid, semi-solid or soft  
48  
49 130 foods at the age of six months while sustaining breastfeeding [31].  
50

51 131 **Early initiation of breastfeeding:** Proportion of children born in the last 24 months who were put  
52  
53 132 to the breast within one hour after birth [31].  
54  
55

1  
2  
3 133 **Household Wealth index:** proxy measure of household living standards based on available assets  
4  
5 134 like a productive asset, durable assets, domestic animals and housing characteristics [24].  
6

### 7 135 **Quality control**

8  
9  
10 136 Data collection tools initially prepared in English and translated into Amharic and then back to  
11  
12 137 English to check for its consistency. Pretest was done on 5 % of the study sample, two days training  
13  
14  
15 138 was given for data collectors and supervisors, data collection were supervised daily and data were  
16  
17 139 double-entered for cross-validation.  
18

### 19 140 **Statistical analysis**

20  
21 141 Before data enter to computer checked for completeness, accuracy and data were entered, and  
22  
23 142 coded into Epi-Data Version 3.1 and exported to IBM-SPSS 22 Statistical Software for analysis.

24  
25  
26 143 The household wealth index was computed using principal component analysis (PCA) and  
27  
28 144 categorized into three quintiles: poor, medium and rich.

29  
30  
31 145 Bi-variable logistic regression was done to see the association between each independent variable  
32  
33 146 and the dependent variable. Variables with p-value < 0.25 in bi-variable analyses were retained  
34  
35 147 for multivariable logistic regression analysis to control for possible confounders and to identify  
36  
37 148 predictors of anemia. Adjusted odds ratios (AOR) with 95 % confidence intervals were used to  
38  
39 149 measure the strength of the association between the dependent variable and independent variables.  
40  
41  
42 150 Factors with P-value < 0.05 reported as statistically significant.  
43

## 44 151 **Results**

### 45 152 **Socio demographic characteristics of the study participants**

46  
47 153 From 531 mother-children pair participated in the study, 260 (49%) were males and 271 (51%)  
48  
49 154 were females. The mean ( $\pm$ SD) age of children was (14.7  $\pm$ 5.1) months and the mean ( $\pm$ SD) age  
50  
51 155 of mothers/caregivers was 27 ( $\pm$ 4.4) years. A majority of 500 (94.2%) mothers were married and  
52  
53 156 467 (87.9%) had formal education (Table1).  
54  
55  
56  
57

157 Table 1: Socio-demographic characteristics of study population in Debre Berhan Town, Ethiopia,  
 158 February 2018 (n=531)

| Variables                          |                          | Frequency | %    |
|------------------------------------|--------------------------|-----------|------|
| Maternal age                       | 19-24                    | 149       | 28.1 |
|                                    | 25-29                    | 253       | 47.6 |
|                                    | ≥30                      | 129       | 24.3 |
| Maternal religion                  | Orthodox                 | 505       | 95.1 |
|                                    | Muslim                   | 15        | 2.8  |
|                                    | Other*                   | 11        | 2.1  |
| Maternal ethnicity                 | Amhara                   | 490       | 92.3 |
|                                    | Oromo                    | 37        | 7    |
|                                    | Other**                  | 4         | 0.7  |
| Maternal education                 | Have no formal education | 64        | 12   |
|                                    | Primary                  | 137       | 25.8 |
|                                    | Secondary                | 155       | 29.2 |
|                                    | College and above        | 175       | 33   |
| Maternal marital status            | Single                   | 19        | 3.6  |
|                                    | Married                  | 500       | 94.2 |
|                                    | Divorced                 | 7         | 1.3  |
|                                    | Widowed                  | 5         | 0.9  |
| Maternal occupation                | Housewife                | 293       | 55.2 |
|                                    | Merchant                 | 75        | 14.1 |
|                                    | Employed                 | 147       | 27.1 |
|                                    | Farmer                   | 16        | 3    |
| Husband educational status (n=500) | Unable to read and write | 6         | 1.2  |
|                                    | Able to read and write   | 16        | 3.2  |
|                                    | Primary                  | 110       | 22   |
|                                    | Secondary                | 162       | 32.4 |
|                                    | College and above        | 206       | 41.2 |

|                                 |          |     |      |
|---------------------------------|----------|-----|------|
| Husband occupation (500)        | Employed | 361 | 71.6 |
|                                 | Merchant | 110 | 22   |
|                                 | Farmer   | 29  | 5.8  |
| Family size                     | ≤3       | 190 | 35.8 |
|                                 | 4-5      | 273 | 51.4 |
|                                 | ≥6       | 68  | 12.8 |
| Number of under five            | One      | 430 | 81   |
|                                 | Two      | 100 | 19   |
|                                 | Three    | 1   | 0.2  |
| Child age (in completed months) | 6-11     | 175 | 33   |
|                                 | 12-17    | 176 | 33.1 |
|                                 | 18-23    | 180 | 33.9 |
| Child history of illness        | Yes      | 141 | 26.6 |
|                                 | No       | 390 | 73.4 |

159 Other\*, Other\*\*

### 160 Children feeding practices

161 Almost all, 526 (99.1%) children ever breastfeeding and 482(91.2%) initiated breast feeding within  
 162 one hour after birth. Nearly fourth fifth, 424 (79.8%) children exclusively breastfed up to six  
 163 months and 520 (97.9 %) were introduced to complementary food at six months. A majority of  
 164 434 (81.7%) were breastfed prior to the survey. More than half, 290 (54.6 %) children met  
 165 minimum meal frequency (Table 2). Cereals, roots, and tubers were the most consumed food  
 166 groups (91.1%) and vitamin A was the least (22.4%) consumed food group (figure1).

167 Table 2: Infant and young children feeding practice among children aged 6–23 months in Debre  
 168 Berhan Town, North Shewa Zone, Amhara Regional state, February 2018

| Variables (n=531)      | Frequency | Percent |
|------------------------|-----------|---------|
| <b>Ever breastfeed</b> |           |         |
| Yes                    | 526       | 99.1    |

|                                                        |     |      |
|--------------------------------------------------------|-----|------|
| No                                                     | 5   | 0.9  |
| <b>Initiation of breastfeeding (n=526)</b>             |     |      |
| ≤ 1 hour                                               | 482 | 91.6 |
| ≥ 1 hours                                              | 44  | 8.4  |
| <b>Currently breastfeed (n=526)</b>                    |     |      |
| Yes                                                    | 434 | 82.5 |
| No                                                     | 92  | 17.5 |
| <b>Prelacteal feeding</b>                              |     |      |
| Yes                                                    | 9   | 1.7  |
| No                                                     | 522 | 97.3 |
| <b>Bottle feeding</b>                                  |     |      |
| Yes                                                    | 258 | 48.6 |
| No                                                     | 273 | 51.4 |
| <b>Introduction of complementary food</b>              |     |      |
| Yes                                                    | 520 | 97.9 |
| No                                                     | 11  | 2.1  |
| <b>Age of child complementary food initiated (520)</b> |     |      |
| <6 months                                              | 80  | 15.1 |
| At 6 months                                            | 326 | 61.4 |
| >6 months                                              | 114 | 21.5 |
| <b>Milk feed for non-breastfed children (n=97)</b>     |     |      |
| Receive at least 2 milk feed                           | 57  | 58.8 |
| Not receive 2 milk feed                                | 40  | 41.2 |
| <b>Meet minimum meal frequency</b>                     |     |      |
| Yes                                                    | 290 | 54.6 |
| No                                                     | 241 | 45.4 |
| <b>Meet minimum dietary diversity</b>                  |     |      |
| Yes                                                    | 235 | 44.3 |
| No                                                     | 296 | 55.7 |

## 170 **Prevalence of minimum acceptable diet**

171 The overall prevalence of the minimum acceptable diet was 168 [31.6 %, 95% CI: (27.7, 35.2)].  
172 However, 101 (38.7%) of the females consumed MAD versus males 67 (24.8%). The highest  
173 proportion of 74 (40%) children who consumed the minimum acceptable diet were aged 18-23  
174 months (Figure 2).

## 175 **Factors Associated with the minimum acceptable diet**

176 During bi-variable logistic regression analysis: parent education, maternal fruit consumption, head  
177 of household, IYCF advice from HEWs, ANC follow-up, growth monitoring utilization, child age,  
178 child history of illness, presence of home garden, household food security, and wealth index were  
179 significantly associated with minimum acceptable diet. In the multivariable analysis: parent  
180 education, ANC contacts, IYCF advice from HEWs, growth monitoring utilization, child history  
181 of illness, child age and presence of home garden had significant association to minimum  
182 acceptable diet.

183 Children of mothers who attained secondary education had 4.9 times [AOR=4.9, 95% CI: (1.3,  
184 18.9)] higher odds of MAD and those who attained college and above were 6.4 times [AOR=6.4,  
185 95% CI: (1.5, 26.6)] more odds of meeting MAD as compared to children of mother who had no  
186 formal education. Likewise, child whose father had primary education had 6.5 times [AOR=6.5,  
187 95% CI: (1.5, 27.4)] higher odds of meeting MAD than child whose father had no formal  
188 education.

189 The odds of MAD was 1.8 times [AOR=1.8, 95% CI: (1.0, 3.4)] and 2.2 times [AOR=2.2, 95%  
190 CI: (1.2, 3.9)] higher among children aged 12-17 and 18-23 months as compared to children aged  
191 6-11 months respectively. Children had no history of illness two weeks prior to the survey had 2.9  
192 times [AOR=2.9, 95% CI: (1.5, 6.0)] more odds of MAD than their counterparts. The odds of  
193 MAD among children whose mothers utilized growth monitoring were 1.8 times [AOR=1.8, 95%  
194 CI: (1.1, 2.9)] higher than mother did not utilize child growth monitoring. Antenatal care follow-

195 up significantly associated with MAD. Children of mothers who had four ANC contacts had 2.0  
 196 times [AOR=2.0, 95% CI: (1.0, 3.9)] more odds of meeting MAD than their counterparts. Children  
 197 of mothers who received infant and young child feeding advice had 2.4 times [AOR=2.4, 95% CI:  
 198 (1.4, 3.9) higher odds to meet MAD than their counterparts (Table 3).

199 Table 3: Multivariable logistic regression analysis predicting the likelihood of having minimum  
 200 acceptable diet among children aged 6-23 months in Debre Berhan Town, Amhara region,  
 201 Ethiopia, 2018, (n=531)

| Variables                              |              | Meet MAD      |             | COR (95% CI)      | AOR(95%CI)              |
|----------------------------------------|--------------|---------------|-------------|-------------------|-------------------------|
|                                        |              | Yes           | No          |                   |                         |
| <b>Household food security</b>         | Yes          | 116(43.4)     | 151 (56.6)  | 3.13 (2.1, 4.6)   | 1.5 (0.85, 2.5)         |
|                                        | No           | 52 (19.7)     | 212 (80.3)  | Reference         | Reference               |
| <b>Growth monitoring utilization</b>   | Yes          | 102<br>(40.8) | 148 (59.2)  | 2.2 (1.5, 3.3)    | <b>1.8 (1.1, 2.9)*</b>  |
|                                        | No           | 66 (23.5)     | 215 (76.5)  | Reference         | Reference               |
| <b>Child History of illness</b>        | Yes          | 16 (11.3)     | 125 (88.7)  | Reference         | Reference               |
|                                        | No           | 152<br>(39.0) | 238 (61.0)  | 4.99 (2.85, 8.72) | <b>2.9 (1.5, 6.0)*</b>  |
| <b>Maternal education</b>              | No education | 3 (4.7)       | 61(95.3)    | Reference         | Reference               |
|                                        | Grade 1-8    | 14 (10.2)     | 123 (89.8)  | 2.31 (0.64, 8.36) | 0.1 (0.3, 4.5)          |
|                                        | Grade 9-12   | 60 (38.7)     | 95 (61.3)   | 12.8(3.9,42.8)    | <b>4.9 (1.3, 18.9)*</b> |
|                                        | ≥College     | 91 (52.0)     | 84 (48.0)   | 22.0(6.7,72.9)    | <b>6.4 (1.5, 26.6)*</b> |
| <b>Head of household</b>               | Father       | 68 (24.6)     | 208 ( 75.4) | Reference         | Reference               |
|                                        | Mother       | 11 (26.2)     | 31 (73.8)   | 1.08(0.52,2.3)    | 1.3 (0.4, 4.1)          |
|                                        | Both         | 89 (41.8)     | 124 (59.2)  | 2.2 (1.5, 3.2)    | 1.0 (0.6, 1.8)          |
| <b>Child age (in completed months)</b> | 6-11         | 31 (17.7)     | 144 (82.3)  | Reference         | Reference               |
|                                        | 12-17        | 64 (36.4)     | 112 (63.6)  | 2.65 (1.6,4.35)   | <b>1.8 (1.0, 3.4)*</b>  |
|                                        | 18-23        | 73 (40.6)     | 107 (59.4)  | 3.2 (1.9,5.2)     | <b>2.2 (1.2, 3.9)*</b>  |

|                                          |                     |               |            |                 |                         |
|------------------------------------------|---------------------|---------------|------------|-----------------|-------------------------|
| <b>Mother fruit consumption per week</b> | ≥3 times            | 139<br>(35.9) | 248 (64.1) | 2.2(1.4, 3.5)   | 1.3 (0.7, 2.3)          |
|                                          | <3 times            | 29 (20.1)     | 115(79.9)  | Reference       | Reference               |
| <b>IYCF Advice from HEW</b>              | Yes                 | 84 (45.2)     | 102 (54.8) | 2.6 (1.8, 3.7)  | <b>2.4 (1.4, 3.9)*</b>  |
|                                          | No                  | 84 (24.3)     | 261 (75.7) | Reference       | Reference               |
| <b>Have home garden</b>                  | Yes                 | 48 (44.4)     | 60 (55.6)  | 3.6 (2.3, 5.6)  | <b>2.5 (1.5, 4.3)*</b>  |
|                                          | No                  | 108<br>(25.5) | 315 (74.5) | Reference       | Reference               |
| <b>Number of ANC contacts</b>            | ≥4 ANC              | 147<br>(42.0) | 203 (58.0) | 5.5 (3.3, 9.1)  | <b>2.0 (1.0, 3.9)*</b>  |
|                                          | ≤3 ANC              | 21 (11.6)     | 160 (88.4) | Reference       | Reference               |
| <b>Paternal education</b>                | No formal education | 8 (15.1)      | 45 (84.9)  | Reference       | Reference               |
|                                          | Primary education   | 33 (30.0)     | 77 (70.0)  | 2.6 (1.09, 6.1) | <b>6.5 (1.5, 27.4)*</b> |
|                                          | Secondary education | 39 (24.1)     | 123 (65.9) | 1.7(0.7, 3.9)   | 2.7 (0.7, 11.1)         |
|                                          | College & above     | 88 (42.7)     | 118 (57.3) | 3.98 (1.8, 8.9) | 2.9 (0.7, 11.6)         |
| <b>Wealth index</b>                      | Poor                | 43 (22.9)     | 145 (77.1) | Reference       | Reference               |
|                                          | Medium              | 59 (33.1)     | 119 (66.9) | 1.7 (1.05,3.6)  | 0.9 (0.5, 1.8)          |
|                                          | Rich                | 66 (40.0)     | 99 (60.0)  | 2.25 (1.4, 3.6) | 1.1 (0.6, 2.1)          |

202 \*Significant at P-value <0.05

## 203 Discussion

204 The study assessed the prevalence of minimum acceptable diet and associated factors but, the study  
 205 should be interpreted with caution since our study conducted during post-harvest, this seasonal  
 206 variation influence study result and the study also indicated point time results.



1  
2  
3 207 The study results revealed that 31.6% infants and young children aged 6-23 months consumed  
4  
5 208 according to recommended acceptable dietary standards. Similar studies have been found in  
6  
7  
8 209 Gahanna DHS analysis (29.9%) and Nepal (33%) [14, 32]. However, a higher prevalence than the  
9  
10 210 current study was reported in Indonesia (44.9%), China (41.6%), India (35.6%, 37.7%) and  
11  
12 211 Bangladesh (39.9%) [12, 33-36]. In contrast, a lower prevalence was observed in Philippine  
13  
14  
15 212 (6.7%), Pakistan (8%), Nepal (26.5%) and Uganda (23-26.3 %) [26, 37-39]. The variation could  
16  
17 213 be explained by study period and sample size differences. Proportion of MAD in the present study  
18  
19 214 significantly higher than the prevalence reported in Ethiopia (7%) [24] and (6.1 %) [40]. The  
20  
21 215 possible reason may be due to differences in time period, study setting, sample size and educational  
22  
23 216 status. Our study was conducted in urban setting and on small sample relative to the EDHS sample  
24  
25  
26 217 size. The EDHS report is nationwide result with majority of participants were living in rural. Rural  
27  
28 218 population are less educated, have less IYCF information and have dietary habit variation from  
29  
30 219 urban population. This implies that being urban residence and educated increases access to media  
31  
32  
33 220 and education materials about IYCF.

34  
35  
36 221 Our study identify different factors associated with minimum acceptable diet. Parent educational  
37  
38 222 status had significant association with MAD standard. This finding is consistent with study results  
39  
40 223 in Nepal [32], Indonesia [20], Bangladesh [33], Ghana [14], Tanzania [41] and Ethiopia [25].  
41  
42 224 Mother who had secondary and college level education had five to six times higher odds to feed  
43  
44 225 their children recommended MAD and children whose father had primary education were 6.5  
45  
46 226 times more likely to meet MAD. This is due to educated parents could have good understanding  
47  
48 227 about infant and young children feeding counseling, materials and messages delivered by health  
49  
50 228 professionals and media. Higher level of education also increase income and higher income  
51  
52 229 enables household access to more diversified diet. Maternal antenatal care follow-up and child  
53  
54  
55  
56  
57  
58  
59  
60

1  
2  
3 230 growth monitoring service utilization had significant association with minimum acceptable diet.  
4  
5 231 Mother who had four and above ANC contacts were two times more likely feed their child  
6  
7  
8 232 acceptable diet while children whose mother who utilized child growth monitoring had two times  
9  
10 233 higher odds to get MAD than their counter parts. Similar results were report in Nepal [42] and  
11  
12 234 Philippine [26]. Well baby clinic and ANC follow up are among the six contact points where infant  
13  
14 235 and young child feeding education and counseling delivered to mother. This nutrition advice and  
15  
16 236 counseling may bring maternal behavioral change towards child feeding practices and may  
17  
18 237 encourage mother to provide minimum acceptable diet to a child. So maternal ANC follow up and  
19  
20 238 child growth monitoring utilization should be encouraged to reduce inappropriate infant and young  
21  
22 239 child feeding practices.

23  
24  
25  
26  
27 240 Increasing child age associated with meeting minimum acceptable diet. Children aged 12-17 and  
28  
29 241 18-23 were nearly two times more likely to consume minimum acceptable diet than children aged  
30  
31 242 6-11 months. This finding is line with study reports from Gahanna [14], Uganda [39], Indonesia  
32  
33 243 [36] and Pakistan [38, 43]. The possible explanation is mother may perceive children aged 6-11  
34  
35 244 months have small stomach that unable to digest foods prepared from different food groups. Due  
36  
37 245 to this, mother may feed her child only liquid based foods especially cow milk. This implies that  
38  
39 246 nutrition education and counseling targeting age appropriate infant and young child feeding  
40  
41 247 practices should be given to mother/caregiver.

42  
43  
44  
45  
46 248 Health extension worker advice about IYCF significantly associated with minimum acceptable  
47  
48 249 diet. Mother who get IYCF advice from health extension workers were 2.4 times more odds to  
49  
50 250 give minimum acceptable diet to her child. This may be justified by community based infant and  
51  
52 251 young child nutrition counseling targeting local context promote and encourage mother to give  
53  
54 252 appropriate complementary feeding. Child health status two weeks prior to the survey associated

1  
2  
3 253 with acceptable diet standard. Child had no history of illness were nearly three times higher odds  
4  
5 254 of consuming minimum acceptable diet. This due to the fact that illness cause for loss of appetite  
6  
7  
8 255 that leads to decrease meal frequency and reduce feeding from various food groups; child may  
9  
10 256 prefer only breast milk. Hence, IYCF counseling targeting child feeding during illness should be  
11  
12 257 provided to mothers or caregivers. Presence of home garden associated with minimum acceptable  
13  
14 258 diet. Children from households have home garden had more odds of consuming minimum  
15  
16 259 acceptable diet. This is explained by households have home garden can access fruits or vegetables  
17  
18  
19 260 food groups at home along with staple diet and animal source and this leads to a child to get at  
20  
21 261 least four food groups from seven food groups. The study had its own strength; the study used  
22  
23 262 primary data sources at community level that could be infer to the population, we used relatively  
24  
25  
26 263 large sample size to increase study power, and we also used multivariate analyses to control  
27  
28 264 possible confounders. However the study had limitation; Social desirability bias, and recall bias  
29  
30 265 may affect true estimates and was tried to minimize by probing respondents and providing detail  
31  
32 266 information about the study objectives. Seasonal variation also may affect study result since study  
33  
34 267 was done during post-harvest and cross sectional study design that doesn't show temporal  
35  
36 268 relationship were limitation of the study.  
37  
38  
39  
40

## 41 **Conclusion**

42  
43 270 Generally, overall proportion of infants and young children aged 6-23 months consume minimum  
44  
45 271 acceptable diet in the study area was very low. Inappropriate complementary feeding practice  
46  
47 272 implies that child are at high risk of malnutrition, micronutrient deficiencies leads poor liner  
48  
49 273 growth, mental development and poor human capital development. Existed IYCF intervention  
50  
51 274 strategies that promotes child feeding practice targeting feeding during illness, age appropriate  
52  
53 275 feeding, child growth monitoring, maternal antenatal care service, nutrition education and  
54  
55  
56  
57  
58  
59  
60

1  
2  
3 276 counselling service should be further strengthen and encouraged. In addition, nutrition education  
4  
5 277 and counseling programs targeted to literacy level should be considered.  
6  
7

8 278 **Ethical Consideration:** Institutional Health Research Ethics Review Committee (IHRERC) of  
9  
10 279 Haramaya University, College of Medicine and Health Sciences ethically approved the study  
11  
12 280 with reference number C/Ac/R/D/01/878/18and data were collected after consent taken from  
13  
14 281 study participant.  
15

16  
17 282 **Patient consent for publication:** Not required  
18

19  
20 283 **Data availability:** Data used to analysis this study are found from corresponding author  
21

22 284 **Conflict of interest:** None declared  
23

24 285 **Funding statement:** This research received no specific grant from any funding agency in the  
25  
26 286 public, commercial or not-for-profit sectors.  
27

28  
29 287 **Patient and public involvement:** Patients and/or the public were not involved in the design, or  
30  
31 288 conduct, or reporting, or dissemination plans of this research.  
32

33  
34 289 **Author contributions:** Conception and original draft writing: AM, Study design, data analysis  
35  
36 290 and interpretation: AM, GE, AS, BK, MA, LG and AB, Critically review initial draft and finalizing  
37  
38 291 manuscript: GE, AS, BK, MA, LG and AB, Preparing manuscript: AM and AS. All authors  
39  
40 292 review, and approved final manuscript.  
41

42  
43 293 **Acknowledgments:** We thank to Haramaya University giving this opportunity. Our gratitude  
44  
45 294 also goes to Debre Birhan Town Health Office, Kebeles administrators and Health extension  
46  
47 295 workers providing the necessary information.  
48  
49

## 50 51 296 **References** 52 53 54 55 56 57 58 59 60

- 1  
2  
3 297 1. UNICEF, UNICEF's Approach to Scaling Up Nutrition for Mothers and their Children.  
4  
5 298 2015.
- 6  
7  
8 299 2. GNR, Global Nutrition Report: Shining a light to spur action on nutrition. Bristol, UK:  
9  
10 300 Development Initiatives. 2018.
- 11  
12 301 3. Black, R.E., et al., Maternal and child nutrition building momentum for impact.pdf. lancet  
13  
14 302 2013.
- 15  
16  
17 303 4. GNR, Global Nutrition Report. 2018
- 18  
19 304 5. CARE, Infant and Young Child Feeding Practices: Collecting and Using Data: A Step-  
20  
21 305 byStep Guide. Cooperative for Assistance and Relief Everywhere, Inc. (CARE). 2010.  
22  
23 306 2010.
- 24  
25  
26 307 6. WHO, Essential Nutrition Actions: improving maternal, newborn, infant and young child  
27  
28 308 health and nutrition. World Health Organization, Geneva, Switzerland. 2013.
- 29  
30  
31 309 7. Huffman, S.L. and D. Schofield, Consequences of Malnutrition in Early Life and Strategies  
32  
33 310 to Improve Maternal and Child Diets through Targeted Fortified Products. Maternal &  
34  
35 311 Child Nutrition, 2011. 7.
- 36  
37  
38 312 8. Akombi, B.J., et al., Stunting, Wasting and Underweight in Sub-Saharan Africa: A  
39  
40 313 Systematic Review. International Journal of Environmental Research and Public Health,  
41  
42 314 2017. **14**(863).
- 43  
44  
45 315 9. Horton, S. and R.H. Steckel, Malnutrition: global economic losses attributable to  
46  
47 316 malnutrition 1900–2000 and projections to 2050. How Much Have Global Problems Cost  
48  
49 317 the Earth? A Scorecard from 1900 to, 2013. **2050**: p. 247-272.
- 50  
51 318 10. World Bank, An Investment Framework for Nutrition Reaching the Global Targets for  
52  
53 319 Stunting, Anemia, Breastfeeding, and Wasting. 2016.

- 1  
2  
3 320 11. WHO, Indicators for assessing infant and young child feeding practices Part 1; Definitions.  
4  
5 321 2008.  
6  
7  
8 322 12. Hipgrave, D.B., et al., Poor complementary feeding practices and high anaemia prevalence  
9  
10 323 among infants and young children in rural central and western China. *European Journal of*  
11  
12 324 *Clinical Nutrition* 2014. **68**: p. 916-924.  
13  
14  
15 325 13. Manikam, L., et al., A systematic review of complementary feeding practices in South  
16  
17 326 Asian infants and young children: the Bangladesh perspective. *BMC Nutrition* 2017. **3**(56):  
18  
19 327 p. 1-13.  
20  
21  
22 328 14. Issaka, A.I., et al., Determinants of inadequate complementary feeding practices among  
23  
24 329 children aged 6–23 months in Ghana. *Public Health Nutrition*, 2014. **18**(4): p. 669-678.  
25  
26 330 15. Deressa, G.Y. and A.M. Agajie, Infant and Young Child Feeding Practices and Associated  
27  
28 331 Factors in Benishangul Gumuz Regional State, North West, Ethiopia *Public Health*  
29  
30 332 *International* 2017. **2**(1): p. 18-27.  
31  
32  
33 333 16. Belew, A.K., et al., Dietary diversity and meal frequency among infant and young children:  
34  
35 334 a community based study. *Italian Journal of Pediatrics* 2017. **43**(73): p. 2-10.  
36  
37  
38 335 17. Bedada Damtie, S., et al., Dietary Diversity Practice and Associated Factors among  
39  
40 336 Children Aged 6–23 Months in Robe Town, Bale Zone, Ethiopia. *Journal of Nutrition and*  
41  
42 337 *Metabolism*, 2020. **2020**.  
43  
44  
45 338 18. Beyene, M., et al., Dietary diversity, meal frequency and associated factors among infant  
46  
47 339 and young children in Northwest Ethiopia: a cross- sectional study. *BMC Public Health*  
48  
49 340 2015. **15**(1007 ): p. 1-10.  
50  
51  
52  
53  
54  
55  
56  
57  
58  
59  
60

- 1  
2  
3 341 19. Kassa, T., et al., Appropriate complementary feeding practices and associated factors  
4  
5 342 among mothers of children age 6–23 months in Southern Ethiopia, 2015. *BMC Pediatrics*  
6  
7 343 2016. **16**(131): p. 2-10.
- 8  
9  
10 344 20. Liben, M.L., et al., Factors Associated with Dietary Diversity among Children of Agro  
11  
12 345 Pastoral Households in Afar Regional State, Northeastern Ethiopia. *Academic Journal of*  
13  
14 346 *Pediatrics & Neonatology*, 2017. **5**(3).
- 15  
16  
17 347 21. Mekonnen, T.C., et al., Meal frequency and dietary diversity feeding practices among  
18  
19 348 children 6–23 months of age in Wolaita Sodo town, Southern Ethiopia. *Journal of Health,*  
20  
21 349 *Population and Nutrition* 2017. **36**(18): p. 2-8.
- 22  
23  
24 350 22. Moges, B., et al., Unmet Minimum Dietary Diversity Status and its Predictors: A Practical  
25  
26 351 Assessment of Feeding Foods with Adequate Micronutrient-Density for Infant and Young  
27  
28 352 Children in Silti District, Southern Ethiopia. *Journal of Family Medicine & Community*  
29  
30 353 *Health*, 2017. **4**(7): p. 11-33.
- 31  
32  
33 354 23. Solomon, D., et al., Minimum dietary diversity and associated factors among children aged  
34  
35 355 6–23 months in Addis Ababa, Ethiopia. *International Journal for Equity in Health* 2017.  
36  
37 356 **16**(181).
- 38  
39  
40 357 24. EDHS, ETHIOPIA Demographic and Health Survey The DHS Program ICF Rockville,  
41  
42 358 Maryland, USA, 2016.
- 43  
44  
45 359 25. Mulat, E., et al., Uptake of minimum acceptable diet among children aged 6–23 months in  
46  
47 360 orthodox religion followers during fasting season in rural area, DEMBECHA, north West  
48  
49 361 Ethiopia. *BMC Nutrition*, 2019. **5**(1): p. 18.  
50  
51  
52  
53  
54  
55  
56  
57  
58  
59  
60

- 1  
2  
3 362 26. Guirindola, M.O., et al., Determinants of Meeting the Minimum Acceptable Diet Among  
4  
5 363 Filipino Children Aged 6-23 Months. *Philippine Journal of Science*, 2018. **147** (1): p. 75-  
6  
7 364 89.
- 8  
9  
10 365 27. Dangura, D. and S. Gebremedhin, Dietary diversity and associated factors among children  
11  
12 366 6-23 months of age in Gorche district, Southern Ethiopia: Cross-sectional study. *BMC*  
13  
14 367 *Pediatrics* 2017. **17**(6): p. 2-7.
- 15  
16  
17 368 28. Mitchodigni, I.M., et al., Complementary feeding practices: determinants of dietary  
18  
19 369 diversity and meal frequency among children aged 6–23 months in Southern Benin. 2017.  
20  
21 370 **9**: p. 1117-1130.
- 22  
23  
24 371 29. Wondu, G.B. and N. Yang, Determinants of Suboptimal Complementary Feeding Practices  
25  
26 372 among Children Aged 6-23 Months in Selected Urban Slums of Oromia Zones (Ethiopia).  
27  
28 373 *Journal of Nutrition & Food Sciences*, 2017. **7**(3): p. 1-10.
- 29  
30  
31 374 30. Coates, J., et al., Household Food Insecurity Access Scale (HFIAS) for Measurement of  
32  
33 375 Food Access: Indicator Guide: Food and Nutrition Technical Assistance 2007.
- 34  
35  
36 376 31. WHO, Indicators for assessing infant and young child feeding practices part 2:  
37  
38 377 measurement: World Health Organization. 2010.
- 39  
40 378 32. Gautam, K.P., et al., Determinants of infant and young child feeding practices in  
41  
42 379 Rupandehi, Nepal. *BMC Research Notes*, 2016. **9**(135): p. 2-7.
- 43  
44  
45 380 33. Kabir, I., et al., Determinants of inappropriate complementary feeding practices in infant  
46  
47 381 and young children in Bangladesh: secondary data analysis of Demographic Health Survey  
48  
49 382 2007. *Maternal & child nutrition*, 2012. **8**: p. 11-27.
- 50  
51  
52  
53  
54  
55  
56  
57  
58  
59  
60



- 1  
2  
3 383 34. Ahmad, I., et al., Complementary feeding practices among children aged 6–23 months in  
4  
5 384 Aligarh, Uttar Pradesh. *Journal of Family Medicine and Primary Care*, 2017. **6**(2): p. 386-  
6  
7 385 91.  
8  
9  
10 386 35. Singhal, P., et al., Status of infant and young child feeding practices with special emphasis  
11  
12 387 on breast feeding in an urban area of Meerut. *IOSR Journal of Dental and Medical*  
13  
14 388 *Sciences*, 2013. **7**(4): p. 7-11.  
15  
16  
17 389 36. Ng, C.S., et al., Complementary feeding indicators and determinants of poor feeding  
18  
19 390 practices in Indonesia: a secondary analysis of 2007 Demographic and Health Survey data.  
20  
21 391 *Public health nutrition*, 2012. **15**(5): p. 827-839.  
22  
23  
24 392 37. Khanal, V., et al., Determinants of complementary feeding practices among Nepalese  
25  
26 393 children aged 6-23 months: findings from Demographic and Health Survey 2011. *BMC*  
27  
28 394 *Pediatr*, 2013. **13**: p. 131.  
29  
30  
31 395 38. Khan, G.N., et al., Determinants of infant and young child feeding practices by mothers in  
32  
33 396 two rural districts of Sindh, Pakistan: a cross-sectional survey. *International Breastfeeding*  
34  
35 397 *Journal* 2017. **1**[von Elm E, #106][von Elm E, #106][von Elm, #106][von Elm, 2020  
36  
37 398 #106]2(40): p. 2-8.  
38  
39  
40 399 39. Mokeri, A., et al., Child factors associated with complementary feeding practices in  
41  
42 400 Uganda. *South African Journal of Clinical Nutrition*, 2017. **30** (1): p. 7-14.  
43  
44  
45 401 40. Tassew, A.A., et al., Factors affecting feeding 6–23 months age children according to  
46  
47 402 minimum acceptable diet in Ethiopia: A multilevel analysis of the Ethiopian Demographic  
48  
49 403 Health Survey. *PloS one*, 2019. **14**(2): p. e0203098.  
50  
51  
52 404 41. Victor, R., et al., Factors associated with inappropriate complementary feeding practices  
53  
54 405 among children aged 6–23 months in Tanzania. *Maternal and Child Nutrition*, 2012.  
55  
56  
57  
58  
59  
60

1  
2  
3 406 42. Kahnal, V., et al., Determinants of complementary feeding practices among Nepalese  
4  
5 407 children aged 6–23 months: findings from demographic and health survey 2011. BMC  
6  
7 408 pediatrics, 2013. **13**(1): p. 131.

9  
10 409 43. Na, M., et al., Risk factors of poor complementary feeding practices in Pakistani children  
11  
12 410 aged 6-23 months: A multilevel analysis of the Demographic and Health Survey 2012-  
13  
14 411 2013. *Matern Child Nutr*, 2017. **13 Suppl 2**(Suppl 2).

16  
17  
18 412 **Figure legend**

19  
20  
21 413 Figure 1: Percentage consumption of food groups among infant and youn children aged 6-23  
22  
23 414 months in Debre Berhan Town, Ethiopia, February 2018.

24  
25  
26 415 Figure 2: distribution of MAD by sex and age group among infant and young children aged 6-23  
27 416 months in Debre Birhan Town, Ethiopia 2018.

1  
2  
3  
4  
5  
6  
7  
8  
9  
10  
11  
12  
13  
14  
15  
16  
17  
18  
19  
20  
21  
22  
23  
24  
25  
26  
27  
28  
29  
30  
31  
32  
33  
34  
35  
36  
37  
38  
39  
40  
41  
42  
43  
44  
45  
46  
47  
48  
49  
50  
51  
52  
53  
54  
55  
56  
57  
58  
59  
60

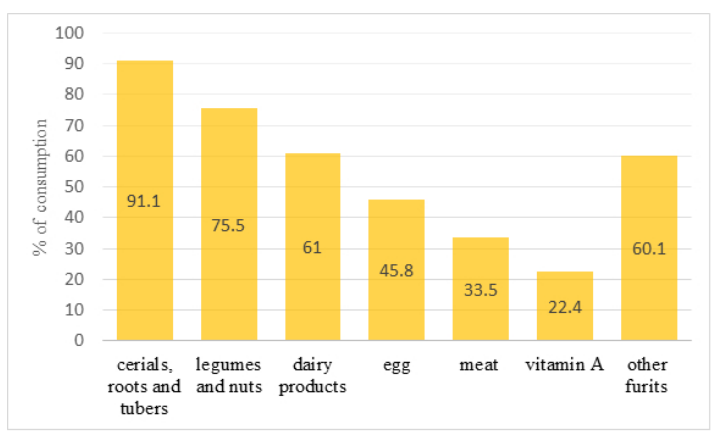

Figure 1: Percentage consumption of food groups among infant and young children aged 6-23 months in Debre Berhan Town, Ethiopia, February 2018

216x121mm (96 x 96 DPI)

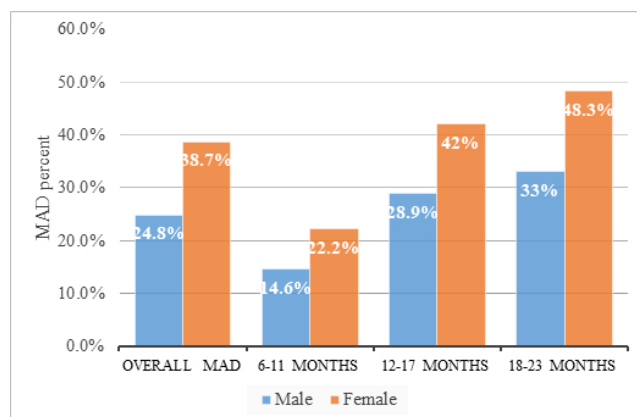

Figure 2: distribution of MAD by sex and age group among infant and young children aged 6-23 months in Debre Birhan Town, Ethiopia 2018

216x121mm (96 x 96 DPI)

# Reporting checklist for cross sectional study.

Based on the STROBE cross sectional guidelines.

## Instructions to authors

Complete this checklist by entering the page numbers from your manuscript where readers will find each of the items listed below.

Your article may not currently address all the items on the checklist. Please modify your text to include the missing information. If you are certain that an item does not apply, please write "n/a" and provide a short explanation.

Upload your completed checklist as an extra file when you submit to a journal.

In your methods section, say that you used the STROBE cross sectional reporting guidelines, and cite them as:

von Elm E, Altman DG, Egger M, Pocock SJ, Gøtzsche PC, Vandenbroucke JP. The Strengthening the Reporting of Observational Studies in Epidemiology (STROBE) Statement: guidelines for reporting observational studies.

|                           |                     | Reporting Item                                                                                                                  | Page Number |
|---------------------------|---------------------|---------------------------------------------------------------------------------------------------------------------------------|-------------|
| <b>Title and abstract</b> |                     |                                                                                                                                 |             |
| Title                     | <a href="#">#1a</a> | Indicate the study's design with a commonly used term in the title or the abstract                                              | 1           |
| Abstract                  | <a href="#">#1b</a> | Provide in the abstract an informative and balanced summary of what was done and what was found                                 | 1&2         |
| <b>Introduction</b>       |                     |                                                                                                                                 |             |
| Background / rationale    | <a href="#">#2</a>  | Explain the scientific background and rationale for the investigation being reported                                            | 3 &4        |
| Objectives                | <a href="#">#3</a>  | State specific objectives, including any prespecified hypotheses                                                                | 4           |
| <b>Methods</b>            |                     |                                                                                                                                 |             |
| Study design              | <a href="#">#4</a>  | Present key elements of study design early in the paper                                                                         | 4           |
| Setting                   | <a href="#">#5</a>  | Describe the setting, locations, and relevant dates, including periods of recruitment, exposure, follow-up, and data collection | 4 & 5       |
| Eligibility criteria      | <a href="#">#6a</a> | Give the eligibility criteria, and the sources and methods of selection of participants.                                        | 5           |

|    |                     |                      |                                                                                                |
|----|---------------------|----------------------|------------------------------------------------------------------------------------------------|
| 1  |                     | <a href="#">#7</a>   | Clearly define all outcomes, exposures, predictors, potential confounders, and effect          |
| 2  |                     |                      | modifiers. Give diagnostic criteria, if applicable NA                                          |
| 3  |                     |                      |                                                                                                |
| 4  |                     |                      |                                                                                                |
| 5  | Data sources /      | <a href="#">#8</a>   | For each variable of interest give sources of data and details of methods of assessment        |
| 6  | measurement         |                      | (measurement). Describe comparability of assessment methods if there is more than one          |
| 7  |                     |                      | group. Give information separately for for exposed and unexposed groups if applicable. NA      |
| 8  |                     |                      |                                                                                                |
| 9  |                     |                      |                                                                                                |
| 10 | Bias                | <a href="#">#9</a>   | Describe any efforts to address potential sources of bias                                      |
| 11 |                     |                      |                                                                                                |
| 12 |                     |                      |                                                                                                |
| 13 | Study size          | <a href="#">#10</a>  | Explain how the study size was arrived at 5                                                    |
| 14 |                     |                      |                                                                                                |
| 15 | Quantitative        | <a href="#">#11</a>  | Explain how quantitative variables were handled in the analyses. If applicable, describe       |
| 16 | variables           |                      | which groupings were chosen, and why                                                           |
| 17 |                     |                      |                                                                                                |
| 18 |                     |                      |                                                                                                |
| 19 | Statistical methods | <a href="#">#12a</a> | Describe all statistical methods, including those used to control for confounding 7            |
| 20 |                     |                      |                                                                                                |
| 21 | Statistical methods | <a href="#">#12b</a> | Describe any methods used to examine subgroups and interactions NA                             |
| 22 |                     |                      |                                                                                                |
| 23 |                     |                      |                                                                                                |
| 24 | Statistical methods | <a href="#">#12c</a> | Explain how missing data were addressed 5                                                      |
| 25 |                     |                      |                                                                                                |
| 26 | Statistical methods | <a href="#">#12d</a> | If applicable, describe analytical methods taking account of sampling strategy                 |
| 27 |                     |                      |                                                                                                |
| 28 | Statistical methods | <a href="#">#12e</a> | Describe any sensitivity analyses NA                                                           |
| 29 |                     |                      |                                                                                                |
| 30 |                     |                      |                                                                                                |
| 31 | <b>Results</b>      |                      |                                                                                                |
| 32 |                     |                      |                                                                                                |
| 33 | Participants        | <a href="#">#13a</a> | Report numbers of individuals at each stage of study—eg numbers potentially eligible,          |
| 34 |                     |                      | examined for eligibility, confirmed eligible, included in the study, completing follow-up, and |
| 35 |                     |                      | analysed. Give information separately for for exposed and unexposed groups if applicable.      |
| 36 |                     |                      | NA                                                                                             |
| 37 |                     |                      |                                                                                                |
| 38 |                     |                      |                                                                                                |
| 39 |                     |                      |                                                                                                |
| 40 | Participants        | <a href="#">#13b</a> | Give reasons for non-participation at each stage NA                                            |
| 41 |                     |                      |                                                                                                |
| 42 | Participants        | <a href="#">#13c</a> | Consider use of a flow diagram NA                                                              |
| 43 |                     |                      |                                                                                                |
| 44 |                     |                      |                                                                                                |
| 45 | Descriptive data    | <a href="#">#14a</a> | Give characteristics of study participants (eg demographic, clinical, social) and information  |
| 46 |                     |                      | on exposures and potential confounders. Give information separately for exposed and            |
| 47 |                     |                      | unexposed groups if applicable. 8-10                                                           |
| 48 |                     |                      |                                                                                                |
| 49 |                     |                      |                                                                                                |
| 50 | Descriptive data    | <a href="#">#14b</a> | Indicate number of participants with missing data for each variable of interest NA             |
| 51 |                     |                      |                                                                                                |
| 52 |                     |                      |                                                                                                |
| 53 | Outcome data        | <a href="#">#15</a>  | Report numbers of outcome events or summary measures. Give information separately for          |
| 54 |                     |                      | exposed and unexposed groups if applicable. NA                                                 |
| 55 |                     |                      |                                                                                                |
| 56 |                     |                      |                                                                                                |
| 57 |                     |                      |                                                                                                |
| 58 |                     |                      |                                                                                                |
| 59 |                     |                      |                                                                                                |
| 60 |                     |                      |                                                                                                |

|    |                    |                      |                                                                                                  |
|----|--------------------|----------------------|--------------------------------------------------------------------------------------------------|
| 1  | Main results       | <a href="#">#16a</a> | Give unadjusted estimates and, if applicable, confounder-adjusted estimates and their            |
| 2  |                    |                      | precision (eg, 95% confidence interval). Make clear which confounders were adjusted for and      |
| 3  |                    |                      | why they were included 10-12                                                                     |
| 4  |                    |                      |                                                                                                  |
| 5  |                    |                      |                                                                                                  |
| 6  | Main results       | <a href="#">#16b</a> | Report category boundaries when continuous variables were categorized                            |
| 7  |                    |                      |                                                                                                  |
| 8  |                    |                      |                                                                                                  |
| 9  | Main results       | <a href="#">#16c</a> | If relevant, consider translating estimates of relative risk into absolute risk for a meaningful |
| 10 |                    |                      | time period NA                                                                                   |
| 11 |                    |                      |                                                                                                  |
| 12 | Other analyses     | <a href="#">#17</a>  | Report other analyses done—e.g., analyses of subgroups and interactions, and sensitivity         |
| 13 |                    |                      | analyses NA                                                                                      |
| 14 |                    |                      |                                                                                                  |
| 15 |                    |                      |                                                                                                  |
| 16 | <b>Discussion</b>  |                      |                                                                                                  |
| 17 |                    |                      |                                                                                                  |
| 18 |                    |                      |                                                                                                  |
| 19 | Key results        | <a href="#">#18</a>  | Summarise key results with reference to study objectives 13-16                                   |
| 20 |                    |                      |                                                                                                  |
| 21 | Limitations        | <a href="#">#19</a>  | Discuss limitations of the study, taking into account sources of potential bias or imprecision.  |
| 22 |                    |                      | Discuss both direction and magnitude of any potential bias. 16                                   |
| 23 |                    |                      |                                                                                                  |
| 24 |                    |                      |                                                                                                  |
| 25 | Interpretation     | <a href="#">#20</a>  | Give a cautious overall interpretation considering objectives, limitations, multiplicity of      |
| 26 |                    |                      | analyses, results from similar studies, and other relevant evidence. 13                          |
| 27 |                    |                      |                                                                                                  |
| 28 |                    |                      |                                                                                                  |
| 29 | Generalisability   | <a href="#">#21</a>  | Discuss the generalisability (external validity) of the study results 16                         |
| 30 |                    |                      |                                                                                                  |
| 31 | <b>Other</b>       |                      |                                                                                                  |
| 32 |                    |                      |                                                                                                  |
| 33 | <b>Information</b> |                      |                                                                                                  |
| 34 |                    |                      |                                                                                                  |
| 35 | Funding            | <a href="#">#22</a>  | Give the source of funding and the role of the funders for the present study and, if applicable, |
| 36 |                    |                      | for the original study on which the present article is based 16                                  |
| 37 |                    |                      |                                                                                                  |
| 38 |                    |                      |                                                                                                  |

39 None The STROBE checklist is distributed under the terms of the Creative Commons Attribution License CC-BY. This checklist can be  
 40 completed online using <https://www.goodreports.org/>, a tool made by the [EQUATOR Network](#) in collaboration with [Penelope.ai](#)  
 41  
 42  
 43  
 44  
 45  
 46  
 47  
 48  
 49  
 50  
 51  
 52  
 53  
 54  
 55  
 56  
 57  
 58  
 59  
 60

# BMJ Open

## Minimum Acceptable Diet and Associated Factors among Infants and Young Children aged 6-23 months in Amhara Region, Central Ethiopia: A Community-Based Cross-Sectional Study

|                                 |                                                                                                                                                                                                                                                                                                                                                                                                  |
|---------------------------------|--------------------------------------------------------------------------------------------------------------------------------------------------------------------------------------------------------------------------------------------------------------------------------------------------------------------------------------------------------------------------------------------------|
| Journal:                        | <i>BMJ Open</i>                                                                                                                                                                                                                                                                                                                                                                                  |
| Manuscript ID                   | bmjopen-2020-044284.R1                                                                                                                                                                                                                                                                                                                                                                           |
| Article Type:                   | Original research                                                                                                                                                                                                                                                                                                                                                                                |
| Date Submitted by the Author:   | 12-Feb-2021                                                                                                                                                                                                                                                                                                                                                                                      |
| Complete List of Authors:       | Molla, Abebaw; Mizan-Tepi University, Egata, Gudina ; Addis Ababa University College of Health Sciences, Public health<br>Getacher, Lemma ; Debre Berhan University, Public Health, Nutrition<br>Kebede , Bezie; Mizan-Tepi University<br>Sayih, Alemayehu; Mizan-Tepi University<br>Arega, Mikyas; Debre Berhan University, Public Health, Nutrition<br>Bante, Agegnehu; Arba Minch University, |
| <b>Primary Subject Heading</b>: | Nutrition and metabolism                                                                                                                                                                                                                                                                                                                                                                         |
| Secondary Subject Heading:      | Nutrition and metabolism                                                                                                                                                                                                                                                                                                                                                                         |
| Keywords:                       | NUTRITION & DIETETICS, Community child health < PAEDIATRICS, PUBLIC HEALTH                                                                                                                                                                                                                                                                                                                       |
|                                 |                                                                                                                                                                                                                                                                                                                                                                                                  |

SCHOLARONE™  
Manuscripts





I, the Submitting Author has the right to grant and does grant on behalf of all authors of the Work (as defined in the below author licence), an exclusive licence and/or a non-exclusive licence for contributions from authors who are: i) UK Crown employees; ii) where BMJ has agreed a CC-BY licence shall apply, and/or iii) in accordance with the terms applicable for US Federal Government officers or employees acting as part of their official duties; on a worldwide, perpetual, irrevocable, royalty-free basis to BMJ Publishing Group Ltd ("BMJ") its licensees and where the relevant Journal is co-owned by BMJ to the co-owners of the Journal, to publish the Work in this journal and any other BMJ products and to exploit all rights, as set out in our [licence](#).

The Submitting Author accepts and understands that any supply made under these terms is made by BMJ to the Submitting Author unless you are acting as an employee on behalf of your employer or a postgraduate student of an affiliated institution which is paying any applicable article publishing charge ("APC") for Open Access articles. Where the Submitting Author wishes to make the Work available on an Open Access basis (and intends to pay the relevant APC), the terms of reuse of such Open Access shall be governed by a Creative Commons licence – details of these licences and which [Creative Commons](#) licence will apply to this Work are set out in our licence referred to above.

Other than as permitted in any relevant BMJ Author's Self Archiving Policies, I confirm this Work has not been accepted for publication elsewhere, is not being considered for publication elsewhere and does not duplicate material already published. I confirm all authors consent to publication of this Work and authorise the granting of this licence.

1  
2  
3 **Minimum Acceptable Diet and Associated Factors among Infants and Young Children aged**  
4 **6-23 months in Amhara Region, Central Ethiopia: A Community-Based Cross-Sectional**  
5 **Study**  
6  
7  
8  
9

10 Abebaw Molla<sup>1\*</sup>, Gudina Egata<sup>2</sup>, Lemma Getacher<sup>3</sup>, Bezie Kebede<sup>4</sup>, Alemayehu Sayih<sup>1</sup>, Mikyas  
11 Arega<sup>5</sup>, Agegnehu Bante<sup>6</sup>  
12  
13

14  
15 <sup>1</sup>Department of Nursing, College of Health Sciences, Mizan Tepi University, Ethiopia  
16

17 <sup>2</sup>School of Public Health, College of Health and Medical Sciences, Haramaya University, Ethiopia  
18

19 <sup>3</sup>Department of Public Health, College of Medicine and Health Sciences, Debre Berhan University,  
20 Ethiopia  
21  
22

23 <sup>4</sup>Department of Pharmacy, College of Health Sciences, Mizan-Tepi University, Ethiopia  
24

25 <sup>5</sup>Department of Midwifery, College of Medicine and Health Sciences, Debre Berhan University,  
26 Ethiopia  
27  
28

29 <sup>6</sup>School of Nursing, College of Medicine and Health Sciences, Arba Minch University, Arba  
30 Minch Ethiopia  
31  
32

33  
34  
35 \* Corresponding author  
36

37  
38 E-mail address: [abebawtsehay1@gmail.com](mailto:abebawtsehay1@gmail.com) (AM)  
39  
40

41 **Abstract**  
42

43 **Objective:** The primary objective of this study was to assess the prevalence of a minimum  
44 acceptable diet and its associated factors.  
45  
46

47  
48 **Design:** A community-based cross-sectional study design was used.  
49

50  
51 **Setting:** Debre Berhan Town, Ethiopia.  
52  
53  
54  
55  
56  
57  
58  
59  
60

1  
2  
3 **Participants:** A total of 531 infants and young children-mother/caregiver pairs took part in the  
4 study. A one-stage cluster sampling method was used to select study participants using Kebeles as  
5 clusters and three kebeles were selected using a lottery method. Adjusted odds ratio with 95% CI  
6 was estimated to measure the strength of association between minimum acceptable diet and the  
7 predictor variables and statistical significance declared at  $p < 0.05$ .  
8  
9

10  
11  
12 **Primary outcome:** prevalence of minimum acceptable diet and factors associated with minimum  
13 acceptable diet.  
14  
15

16  
17  
18 **Results:** The prevalence of minimum acceptable diet was 168 (31.6 %, 95% CI: (27.7, 35.2)). The  
19 proportion of females meet the minimum acceptable diet compared to males. Cereals, roots, and  
20 tubers were the most consumed food groups (91.1%), while vitamin A was the least consumed  
21 food group (22.4%). Parent educational status, having four ANC visits, growth monitoring  
22 utilization, age of a child, child history of illness two weeks before the survey, mother received  
23 IYCF advice, and children from a household with a home garden were significantly associated  
24 with meeting the minimum acceptable diet.  
25  
26  
27  
28  
29  
30  
31  
32  
33  
34  
35

36  
37 **Conclusion:** The proportion of infants and young children 6-23 months of age who met optimal  
38 complementary feeding was very low and this may put children aged 6-23 months at high risk of  
39 poor linear growth and micronutrient deficiency. Education, ANC, IYCF advice, child growth  
40 monitoring, age of a child, a child with a history of illness two weeks before the survey, and home  
41 gardening practice affect meeting the minimum acceptable diet. Therefore, a mix of appropriate  
42 interventions is required to improve the low prevalence of the minimum acceptable diet.  
43  
44  
45  
46  
47  
48  
49  
50

51  
52 **Key Words:** Associated factors, Debre Berhan Town, Ethiopia, infants and young children aged  
53 6-23 months, Minimum acceptable diet  
54  
55  
56  
57  
58  
59  
60

### Strength and limitation of the study

- The study was conducted at the community level, which is generalizable to the entire population.
- The study used a large sample size to increase study power.
- Use multivariate analyses to control possible confounders.
- The first, limitation of the study was seasonal variation, social desirability bias, and recall bias.
- Second, the study used a cross-sectional study design that didn't show a cause-effect relationship.

### Introduction

Proper nutrition from conception to 24 months of age is a critical window period that determines the survival, health, and nutritional status of a child [1]. The introduction of appropriate nutrition at age six months together with sustaining breastfeeding until two years of age warrants optimal growth, development, and maintain healthy life throughout the life cycle [2]. In contrast, inappropriate infant and young child feeding practices lead to stunted growth and poor cognitive development [3].

In many resource-limited countries, like Ethiopia high rate of growth failure occurs within 24 months of age and thereafter decreases [4], and this mainly because of resource limitations and inappropriate child feeding practices [5]. Consumption of acceptable dietary standards has numerous benefits; including enhanced linear growth, better cognitive development, and high school achievement, reduced risk of non-communicable disease, increased body immunity system, and productivity during adult life [1-4, 6, 7]. Meeting a minimum acceptable diet also essential to

1  
2  
3 reduce macro and micronutrient deficiencies that leads to improving linear growth status [8, 9].  
4  
5 On the other hand, the unmet minimum acceptable diet standard has devastating, long-term, and  
6  
7 irreversible health outcomes such as stunted growth and stunted children become small adults with  
8  
9 different adverse health effects in the life course [2, 4].  
10  
11

12  
13 The minimum acceptable diet (MAD) is an infant and young child feeding indicator designed to  
14  
15 measure appropriate complementary feeding patterns of children aged 6-23 months and MAD is a  
16  
17 composite indicator of the minimum meal frequency and minimum dietary diversity. According  
18  
19 to the WHO definition, MAD is the proportion of children aged 6-23 months who consume the  
20  
21 minimum meal frequency (MMF) and minimum dietary diversity (MDD) during the previous day  
22  
23 or night [10]. The minimum dietary diversity is used to measure the quality of infant and young  
24  
25 child's complementary diet of child diet, while minimum meal frequency is used as a proxy  
26  
27 measure of energy intake or quantity of food consumed other than breast milk. On the contrary,  
28  
29 MAD assesses both micronutrient adequacy and quantity of food consumed during the previous  
30  
31 day or night and measures appropriate complementary feeding practices. In other words, MAD  
32  
33 measures multiple dimensions of infant and young child diet; those children aged 6-23 months  
34  
35 who meet both macronutrient and micronutrient requirements, but MDD and MMF measure one  
36  
37 dimension of infants and young child diets; those infants and young children who meet  
38  
39 micronutrients and macronutrient respectively [9, 10]. To summarize, assessing MAD important  
40  
41 for measuring both energy intake and micronutrient adequacy of a child as compared with  
42  
43 measuring only one dimension of diet: quality or quantity of diet. However, studies in different  
44  
45 areas including Ethiopia showed that consume the recommended minimum acceptable diet in  
46  
47 children aged 6-23 months greatly vary from area to area with the lowest proportion of MAD (8  
48  
49 %, 6.7%, and 6.1%) was reported in Pakistan, Philippines and Ethiopia, respectively [5, 11, 12],  
50  
51  
52  
53  
54  
55  
56  
57  
58  
59  
60

1  
2  
3 while the highest prevalence of minimum acceptable diet (44.9%, 41.6%, and 39.9%) reported in  
4  
5 Indonesia, China and Bangladesh respectively [13-15].  
6  
7

8 Likewise, in Ethiopia, the proportion of children aged 6-23 months who consume the minimum  
9  
10 acceptable diet standard remains low (6.1%-8.6%) [12, 16], whereas stunting and iron deficiency  
11  
12 anemia remain a burden for infants and young children 6-23 months of age [17]. The prevalence  
13  
14 of anemia among children aged 6-23 months reaches 53.7% to 72% [17, 18], and the prevalence  
15  
16 of stunting is 58% [19]. Overall, macronutrient and micronutrient deficiency is a significant  
17  
18 problem in Ethiopia, particularly in the Amhara region where the present study was conducted,  
19  
20 there is a low rate of minimum acceptable dietary standard and the highest level of child  
21  
22 undernutrition has been reported [17, 19, 20]. Thus, determining the prevalence of minimum  
23  
24 acceptable diet and identifying factors associated with poor infant and young child feeding  
25  
26 practices in a multicultural context and different geographical locations is essential to designing  
27  
28 intervention strategies appropriate to the local context. Therefore, the present study aimed to assess  
29  
30 the prevalence of minimum acceptable diet and associated factors among children aged 6-23  
31  
32 months in the Amhara region of Ethiopia.  
33  
34  
35  
36  
37  
38

## 39 **Methods**

### 40 41 42 **Study design, setting, and period**

43  
44 A community-based cross-sectional study design was used from February to March 2018 in Debre  
45  
46 Berhan Town, Shewa, Ethiopia. The town is located 130 km from Addis Ababa, the capital of  
47  
48 Ethiopia. In 2017, the town has a total population of 88369, nine kebeles, one referral hospital,  
49  
50 three health centers, and 14 health posts.  
51  
52  
53

### 54 55 **Study participants and Sampling Technique**

1  
2  
3 The source population was all infants and young children 6–23 months with mother/caregiver  
4 living in Debre Berhan Town, while the infants and young children 6-23 months of age and their  
5 mother/caregiver in the randomly selected Kebeles was the study population. A household  
6 considered eligible if the infant and young child aged 6-23 months with mother /caregiver living  
7 for at least six months in the selected kebeles were included in the study. The child was excluded  
8 from the study if the mother/caregiver was absent in the household or the mother/caregiver was  
9 unable to respond because of the child's illness or her illness and if the eligible household was  
10 closed after three revisits.

11  
12 The required sample size for the study was calculated using a single population proportion formula  
13 with the following assumptions: the proportion of minimum acceptable diet among infants and  
14 young children was 7% [17], a margin of error of 3%, power of 80%, 95% confidence level, design  
15 effect of 1.5 and 10% non-response rate. The final required sample size for the study was 459  
16 infants and young children aged 6-23 months with a mother/caregiver. A one-stage cluster  
17 sampling method was used to select the study population. The town consists of nine kebeles (the  
18 smallest administrative unit) in Ethiopia and kebeles were considered as a cluster to select the  
19 study population. Among the nine clusters, three clusters were selected randomly and data were  
20 collected from every unit in the selected clusters. The total number of eligible infants and young  
21 children aged 6-23 months with their mother/ caregiver was taken from the health extension  
22 workers (HEWs) records. According to the HEWs record, a total of 577 infants and young children  
23 aged 6-23 months-mother pairs were lived in the selected kebeles/clusters. Even though the final  
24 calculated sample size required for the study was 459 infants and young children aged 6-23 months  
25 pair with mother/caregiver, the total number of 577 infants and young children with  
26 mother/caregiver lived in the selected kebeles/clusters. Because of the cluster sampling method,

1  
2  
3 all eligible (577) infants and young children aged 6-23 months with their mother/caregiver living  
4  
5 in the selected clusters were included in the survey.  
6  
7

## 8 **Data collection methods and tools**

9

10 Socio-demographic data were collected using pretested and structured interviewer-administered  
11  
12 questionnaires developed from prior studies [11, 21-23]. The study was conducted per the  
13  
14 Declaration of Helsinki ethical principles for medical research involving human subjects and each  
15  
16 study participant gave informed written consent. The mother/caregiver was interviewed and used  
17  
18 as a primary source of data for the study, but if the mother was absent caregivers were interviewed  
19  
20 to collect the data for the study. Ten diploma and two BSc nurses were trained for data collection  
21  
22 and supervision.  
23  
24  
25

26 Data regarding household wealth were collected using information from ownerships available  
27  
28 assets; ownership of livestock, agricultural land, electronics, radio, television, refrigerator, car,  
29  
30 bicycle, cart, gold, sofa, source of water, availability of electric city, type of toilet and household  
31  
32 characteristics; type of wall, floor, and ceiling [17].  
33  
34  
35

36 Household food security was measured by using Household Food Insecurity Access Scale  
37  
38 (HFIAS), a validated tool developed by Food and Nutrition Technical Assistance (FANTA). The  
39  
40 HFIAS is based on respondent recall in the past 30 days and asks two closely related questions;  
41  
42 nine occurrence questions that examine the experience of food insecurity in the past 4 weeks with  
43  
44 two response choices as 1=yes or 0=no. Each occurrence questions followed by a frequency of  
45  
46 occurrence question that asks the respondent how often the specific condition occurs in the past 4  
47  
48 weeks with the form of Likert scale response as 1= rarely (1 to 2 times in the past 30 days), 2=  
49  
50 sometimes (3 to 10 times in the past 30 days) and 3=often (> 10 times in past 30 days). When  
51  
52  
53  
54  
55  
56  
57  
58  
59  
60



1  
2  
3 summing up the frequency of occurrence questions, the HFIAS score of household range 0-27 and  
4 severity of household food insecurity increase with increase the HFIAS score [24].  
5  
6

7 Infant and young child feeding practices were collected using WHO infant and young child feeding  
8 (IYCF) standardized questionnaires based on the mother recall of food groups given to her child  
9  
10 24 hours before data collection [10]. Finally, all foods the child consumed grouped into seven  
11  
12 food groups: (1) grains, roots, and tubers; (2) legumes and nuts; (3) dairy products; (4) flesh foods;  
13  
14 (5) eggs; (6) vitamin A-rich fruits and vegetables; and (7) other fruits and vegetables [10].  
15  
16  
17  
18

## 19 **Measurements**

20  
21  
22 **Food secure household:** household experience none of food insecurity conditions experience or  
23 just experience worry, but rarely in the past four weeks [24].  
24  
25

26  
27 **Food insecure household:** household experience one of the three levels of food insecurity  
28 conditions; mildly, moderately, and severely food insecurity or access conditions in the past four  
29 weeks categorized as food insecure [24].  
30  
31  
32

33  
34 **Minimum dietary diversity:** consumption of four or more food groups from the WHO  
35 recommended seven food groups within 24 hrs day or night before the survey [10].  
36  
37

38  
39 **Minimum meal frequency:** the minimum number of times the child consumes solid, semi-solid,  
40 or soft foods (including two milk feeds for non-breastfed children) within 24 hrs day or night  
41 before the survey. The minimum number of times is two times for breastfed children aged 6-8  
42 months, three times for children aged 6-23 months, and four times for non-breastfeed children 6-  
43 23 months of age [10].  
44  
45  
46  
47  
48

49  
50 **Minimum acceptable diet:** consumption of the minimum dietary diversity and minimum meal  
51 frequency within 24 hrs day or night before the survey [10].  
52  
53  
54  
55  
56  
57  
58  
59  
60

1  
2  
3 **Timely introduction of complementary feeding:** providing a child with solid, semi-solid, or soft  
4 foods in addition to breast milk at the age of 6 months [10].  
5  
6

7 **Early initiation of breastfeeding:** putting a child to the breast within one hour after birth [10].  
8  
9

10 **Household Wealth index:** A proxy measure of living standards derived from information on  
11 ownership available assets and household characteristics and household classified into three  
12 tertiles categories [17].  
13  
14

## 15 **Quality control**

16

17 Data collection tools were initially prepared in English and translated into Amharic and then back  
18 to English to check for its consistency. A pretest was done on 5 % of the study sample, two days  
19 of training was given for data collectors and supervisors. Principal investigators and supervisors  
20 supervised the data collection process and data were double-entered for cross-validation.  
21  
22  
23  
24  
25  
26  
27  
28

## 29 **Statistical analysis**

30

31 First, data were checked for accuracy and completeness. Then, data were entered into Epi-Data  
32 Version 3.1 and exported to SPSS version 22 for analysis. A STORBE cross sectional reporting  
33 guideline was used [25]. Descriptive statistics were used to describe socio-demographic, child  
34 feeding practice, and maternal and child health care utilization variables. Frequency and  
35 percentage frequency were calculated for categorical data and mean with standard deviation was  
36 calculated for continuous data.  
37  
38  
39  
40  
41  
42  
43  
44

45 Multicollinearity was checked with standard error and predictor with standard error  $\geq 2$  was  
46 considered collinear and removed from the analysis. Bi-variable logistic regression analysis was  
47 done to assess the association between each covariate with MAD. Covariates with p-value  $< 0.25$   
48 during bi-variable logistic regression analysis; parent education, maternal fruit consumption, head  
49 of household, IYCF advice from HEWs, ANC follow-up, growth monitoring utilization, age of a  
50  
51  
52  
53  
54  
55  
56  
57  
58  
59  
60

1  
2  
3 child, a child has a history of illness two weeks before the survey, presence of home garden,  
4 household food security, and wealth index were included in a multivariable logistic regression  
5 model to control all possible confounders and to identify factors significantly associated with  
6 MAD. Unadjusted and adjusted odds ratios with a 95% confidence interval were calculated to  
7 estimate the strength association of each explanatory variable with MAD. Variables with P-value  
8 < 0.05 in the final model were declared statistically significant.  
9

10  
11 The explanatory variables were selected based on previous studies done on MAD [11, 15, 26] and  
12 the following variables were selected to identify factors associated with MAD.  
13

14  
15 Maternal related variables: Age of mother categorized as: 19-24, 25-29 and  $\geq 30$  years of age;  
16 educational status of mother: no formal education, primary education, secondary education, and  
17 college and above; occupational status: housewife, employed, merchant, and farmer; mother  
18 involvement in deciding on what a child to be feed: involved or not involved; mother has a history  
19 of illness within two weeks before the survey: yes or no; ANC visits during pregnancy: less than  
20 three ANC visits and four and above ANC visits; frequency of maternal fruit and vegetable  
21 consumption per week: consume less than three times per week and consume four or more times  
22 per week; mother received infant and young child feeding advice HEWs: yes or no; mother utilize  
23 child growth monitoring service: yes or no; mother with a history of illness two weeks before the  
24 survey; and place of delivery: home delivery or health facility delivery.  
25  
26

27  
28 Father related variables: Father educational status: have no formal education, primary, secondary,  
29 and college or above and father occupation: employed, merchant, and farmer.  
30

31  
32 Child-related variables: Child sex: male or female; child age: age 6-11 months, age 12-17 months,  
33 and age 18-23 months; child initiated to complementary feeding: yes or no; child age at which  
34 child introduced with complimentary food: < 6 months, at 6 months, and after 6 months; child  
35  
36  
37  
38  
39  
40  
41  
42  
43  
44  
45  
46  
47  
48  
49  
50  
51  
52  
53  
54  
55  
56  
57  
58  
59  
60

currently bottle feed: yes or no; and child has a history of illness with two weeks before the survey: yes or no.

Household related variables: A household wealth index was constructed based on principal component analysis (PCA) and the household was categorized into three tertiles: poor, medium, and rich; head of household or a person who is responsible for decision making in a household: father, mother or both; household food security; food secure and food insecure; the presence of home garden: yes or no; and family size: categorized  $\leq 3$ , 4-5, and  $\geq 6$  family members.

Minimum acceptable diet (MAD) was categorized into a dichotomous variable: meeting MAD=1 and not meeting MAD=0. A child who meets both the minimum dietary diversity and minimum meal frequency was classified as meeting MAD otherwise classified as not meeting MAD.

## Results

### Socio-demographic characteristics of the study participants

From 531 mother-children pair participated in the study, 260 (49%) were males and 271 (51%) were females. The mean ( $\pm$ SD) age of children was (14.7  $\pm$ 5.1) months and the mean ( $\pm$ SD) age of mothers/caregivers was 27 ( $\pm$ 4.4) years. A majority of 500 (94.2%) mothers were married and 467 (87.9%) had formal education (Table1).

Table 1: Socio-demographic characteristics of the child with a parent in Debre Berhan Town, Ethiopia, February 2018 (n=531)

| Characteristics                | Frequency N (%) |
|--------------------------------|-----------------|
| <b>Maternal age (in years)</b> |                 |
| 19-24                          | 149 (28.1)      |
| 25-29                          | 253 (47.6)      |
| $\geq 30$                      | 129 (24.3)      |
| <b>Maternal religion</b>       |                 |
| Orthodox                       | 505 (95.1)      |
| Muslim                         | 15 (2.8)        |

|                                           |            |
|-------------------------------------------|------------|
| Other*                                    | 11(2.1)    |
| <b>Maternal ethnicity</b>                 |            |
| Amhara                                    | 490 (92.3) |
| Oromo                                     | 37 (7)     |
| Other**                                   | 4 (0.7)    |
| <b>Maternal level education</b>           |            |
| Have no formal education                  | 64 (12)    |
| Primary                                   | 137 (25.8) |
| Secondary                                 | 155 (29.2) |
| College and above                         | 175 (33)   |
| <b>Maternal marital status</b>            |            |
| Single                                    | 19 (3.6)   |
| Married                                   | 500 (94.2) |
| Divorced                                  | 7 (1.3)    |
| Widowed                                   | 5 (0.9)    |
| <b>Maternal occupation</b>                |            |
| Housewife                                 | 293 (55.2) |
| Merchant                                  | 75 (14.1)  |
| Employed                                  | 147 (27.1) |
| Farmer                                    | 16 (3)     |
| <b>Husband educational status (n=500)</b> |            |
| Have no formal education                  | 53 (4.4)   |
| Primary                                   | 110 (22)   |
| Secondary                                 | 162 (32.4) |
| College and above                         | 206 (41.2) |
| <b>Husband occupation (500)</b>           |            |
| Employed                                  | 361 (71.6) |
| Merchant                                  | 110 (22)   |
| Farmer                                    | 29 (5.8)   |
| <b>Family size</b>                        |            |

|                                        |            |
|----------------------------------------|------------|
| ≤3                                     | 190 (35.8) |
| 4-5                                    | 273 (51.4) |
| ≥6                                     | 68 (12.8)  |
| <b>Number of under-five</b>            |            |
| One                                    | 430 (81)   |
| ≥Two                                   | 101 (19.2) |
| <b>Child age (in completed months)</b> |            |
| 6-11                                   | 175 (33)   |
| 12-17                                  | 176 (33.1) |
| 18-23                                  | 180 (33.9) |
| <b>Household wealth index</b>          |            |
| Poor                                   | 188 (34.4) |
| Medium                                 | 178 (33.5) |
| Rich                                   | 165 (31.1) |

Other\*, Other\*\*

### Infants and young children feeding practices

Almost all, 526 (99.1%) children ever breastfeeding, and 482(91.2%) initiated breastfeeding within one hour after birth. Nearly fourth-fifth, 424 (79.8%) children exclusively breastfed up to six months and 520 (97.9 %) were introduced to complementary food at six months. A majority of 434 (81.7%) were breastfed before the survey. More than half, 290 (54.6 %) children met minimum meal frequency (Table 2). Cereals, roots, and tubers were the most consumed food groups (91.1%) and vitamin A was the least (22.4%) consumed food group (figure1).

Table 2: Infant and young children feeding practice among children aged 6–23 months in Debre Berhan Town, North Shewa Zone, Amhara Regional State, February 2018

| Variables (n=531)                          | Frequency N (%) |
|--------------------------------------------|-----------------|
| <b>Ever breastfeed</b>                     |                 |
| Yes                                        | 526 (99.1)      |
| No                                         | 5 (0.9)         |
| <b>Initiation of breastfeeding (n=526)</b> |                 |
| ≤ 1hour                                    | 482 (91.6)      |
| ≥ 1hours                                   | 44 (8.4)        |
| <b>Currently breastfeed (n=526)</b>        |                 |

|                                                        |            |
|--------------------------------------------------------|------------|
| Yes                                                    | 434 (82.5) |
| No                                                     | 92 (17.5)  |
| <b>Prelacteal feeding</b>                              |            |
| Yes                                                    | 9 (1.7)    |
| No                                                     | 522 (97.3) |
| <b>Bottle feeding</b>                                  |            |
| Yes                                                    | 258 (48.6) |
| No                                                     | 273 (51.4) |
| <b>Introduction of complementary food</b>              |            |
| Yes                                                    | 520 (97.9) |
| No                                                     | 11 (2.1)   |
| <b>Age of child complementary food initiated (520)</b> |            |
| <6 months                                              | 80 (15.1)  |
| At 6 months                                            | 326 (61.4) |
| >6 months                                              | 114 (21.5) |
| <b>Milk feed for non-breastfed children (n=97)</b>     |            |
| Receive at least 2 milk feed                           | 57 (58.8)  |
| Not receive 2 milk feed                                | 40 (41.2)  |
| <b>Meet minimum meal frequency</b>                     |            |
| Yes                                                    | 290 (54.6) |
| No                                                     | 241 (45.4) |
| <b>Meet minimum dietary diversity</b>                  |            |
| Yes                                                    | 235 (44.3) |
| No                                                     | 296 (55.7) |

### Maternal and child health service utilization

The majority, 522 (98.3%) mothers delivered their child at a health facility, and nearly, two-third of 350 (65.9%) mothers had four or more antenatal care during pregnancy. One-quarter of infants and young children 6-23 months of age had a history of illness two weeks before the survey (Table 3).

Table 3: Maternal and child health service utilization in Debre Berhan, Ethiopia, February 2018

| Variables                                                     | Frequency N (%) |
|---------------------------------------------------------------|-----------------|
| <b>Have focused antenatal care follow up during pregnancy</b> |                 |
| Yes                                                           | 350 (65.9)      |
| No                                                            | 181 (34.1)      |
| <b>Child growth monitoring service utilization</b>            |                 |

|                                                              |            |
|--------------------------------------------------------------|------------|
| Yes                                                          | 250 (47.1) |
| No                                                           | 281 (52.9) |
| <b>Place of delivery</b>                                     |            |
| Health facility                                              | 522 (98.3) |
| Home                                                         | 9 (1.7)    |
| <b>Postnatal visit</b>                                       |            |
| Yes                                                          | 205 (38.6) |
| No                                                           | 326 (61.4) |
| <b>Family planning use</b>                                   |            |
| Yes                                                          | 438 (82.5) |
| No                                                           | 93 (17.5)  |
| <b>Received IYCF advice from HEWs</b>                        |            |
| Yes                                                          | 186 (35)   |
| No                                                           | 345 (65)   |
| <b>Maternal history of illness 2 weeks before the survey</b> |            |
| Yes                                                          | 44 (8.3)   |
| No                                                           | 487 (91.7) |
| <b>Child history of illness 2 weeks before the survey</b>    |            |
| Yes                                                          | 141(26.6)  |
| No                                                           | 390 (73.4) |

### Prevalence of minimum acceptable diet

The prevalence of minimum acceptable diet was 168 (31.6 %, 95% CI: (27.7, 35.2)). The proportion of female children who consumed MAD was higher compared with male children aged 6-23 months and two fifths (40%) of infant and young children aged 18-23 months consumed minimum acceptable diet (Figure 2).

### Factors Associated with the minimum acceptable diet

After adjustment for possible confounders and covariates, mother and father educational status, age of the child, presence of home garden, child-free of illness two weeks before the survey, growth monitoring utilization, four or more ANC visits, and received IYCF counseling from HEWS were significantly associated with meeting minimum acceptable diet (Table 4).



Table 4: Factors associated with meeting minimum acceptable diet among children aged 6-23 months in Debre Berhan town, Amhara region, Ethiopia, 2018, (n=531)

| Variables                                                            | Meet<br>MAD N (%) | Not meet<br>MAD N (%) | Crude OR<br>(95% CI) | Adjusted OR<br>(95%CI)  |
|----------------------------------------------------------------------|-------------------|-----------------------|----------------------|-------------------------|
| <b>Household Food security</b>                                       |                   |                       |                      |                         |
| Food secure                                                          | 116(43.4)         | 151 (56.6)            | 3.13 (2.1, 4.6)      | 1.5 (0.85, 2.5)         |
| Food insecure                                                        | 52 (19.7)         | 212 (80.3)            | Reference            | Reference               |
| <b>Child Growth monitoring utilization</b>                           |                   |                       |                      |                         |
| Yes                                                                  | 102 (40.8)        | 148 (59.2)            | 2.2 (1.5, 3.3)       | <b>1.8 (1.1, 2.9)*</b>  |
| No                                                                   | 66 (23.5)         | 215 (76.5)            | Reference            | Reference               |
| <b>Children having a history of illness 2 weeks before the study</b> |                   |                       |                      |                         |
| Yes                                                                  | 16 (11.3)         | 125 (88.7)            | Reference            | Reference               |
| No                                                                   | 152 (39.0)        | 238 (61.0)            | 4.99 (2.85, 8.72)    | <b>2.9 (1.5, 6.0)*</b>  |
| <b>Maternal education</b>                                            |                   |                       |                      |                         |
| No formal education                                                  | 3 (4.7)           | 61(95.3)              | Reference            | Reference               |
| Primary                                                              | 14 (10.2)         | 123 (89.8)            | 2.31 (0.64, 8.36)    | 0.1 (0.3, 4.5)          |
| Secondary                                                            | 60 (38.7)         | 95 (61.3)             | 12.8(3.9,42.8)       | <b>4.9 (1.3, 18.9)*</b> |
| College and above                                                    | 91 (52.0)         | 84 (48.0)             | 22.0(6.7,72.9)       | <b>6.4 (1.5, 26.6)*</b> |
| <b>Head of household</b>                                             |                   |                       |                      |                         |
| Father only                                                          | 68 (24.6)         | 208 ( 75.4)           | Reference            | Reference               |
| Mother only                                                          | 11 (26.2)         | 31 (73.8)             | 1.08(0.52,2.3)       | 1.3 (0.4, 4.1)          |
| Both father and mother                                               | 89 (41.8)         | 124 (59.2)            | 2.2 (1.5, 3.2)       | 1.0 (0.6, 1.8)          |
| <b>Child age (in completed months)</b>                               |                   |                       |                      |                         |
| 6-11                                                                 | 31 (17.7)         | 144 (82.3)            | Reference            | Reference               |
| 12-17                                                                | 64 (36.4)         | 112 (63.6)            | 2.65 (1.6,4.35)      | <b>1.8 (1.0, 3.4)*</b>  |
| 18-23                                                                | 73 (40.6)         | 107 (59.4)            | 3.2 (1.9,5.2)        | <b>2.2 (1.2, 3.9)*</b>  |

|                                                     |            |            |                 |                        |
|-----------------------------------------------------|------------|------------|-----------------|------------------------|
| <b>Mother fruit consumption per week</b>            |            |            |                 |                        |
| ≥3 times                                            | 139 (35.9) | 248 (64.1) | 2.2(1.4, 3.5)   | 1.3 (0.7, 2.3)         |
| <3 times                                            | 29 (20.1)  | 115(79.9)  | Reference       | Reference              |
| <b>The mother receives IYCF counseling from HEW</b> |            |            |                 |                        |
| Yes                                                 | 84 (45.2)  | 102 (54.8) | 2.6 (1.8, 3.7)  | <b>2.4 (1.4, 3.9)*</b> |
| No                                                  | 84 (24.3)  | 261 (75.7) | Reference       | Reference              |
| <b>Presence of home garden</b>                      |            |            |                 |                        |
| Yes                                                 | 48 (44.4)  | 60 (55.6)  | 3.6 (2.3, 5.6)  | <b>2.5 (1.5, 4.3)*</b> |
| No                                                  | 108 (25.5) | 315 (74.5) | Reference       | Reference              |
| <b>Number of ANC visits</b>                         |            |            |                 |                        |
| ≥4 ANC                                              | 147 (42.0) | 203 (58.0) | 5.5 (3.3, 9.1)  | <b>2.0 (1.0, 3.9)*</b> |
| ≤3 ANC                                              | 21 (11.6)  | 160 (88.4) | Reference       | Reference              |
| <b>Father level of education</b>                    |            |            |                 |                        |
| No formal education                                 | 8 (15.1)   | 45 (84.9)  | Reference       | Reference              |
| Primary education                                   | 33 (30.0)  | 77 (70.0)  | 2.6 (1.1, 6.1)  | <b>1.3 (1.5, 2.4)</b>  |
| Secondary education                                 | 39 (24.1)  | 123 (65.9) | 1.7(0.7, 3.9)   | 2.7 (0.7, 11.1)        |
| College &above                                      | 88 (42.7)  | 118 (57.3) | 3.98 (1.8, 8.9) | 2.9 (0.7, 11.6)        |
| <b>Household wealth index</b>                       |            |            |                 |                        |
| Poor                                                | 43 (22.9)  | 145 (77.1) | Reference       | Reference              |
| Medium                                              | 59 (33.1)  | 119 (66.9) | 1.7 (1.05,3.6)  | 0.9 (0.5, 1.8)         |
| Rich                                                | 66 (40.0)  | 99 (60.0)  | 2.25 (1.4, 3.6) | 1.1 (0.6, 2.1)         |

\*Significant at P-value <0.05

## Discussion

The main objective of this study was to assess the prevalence of minimum acceptable diet and identify predictors of minimum acceptable diets among children 6-23 months of age in the study area. The study was conducted in the post-harvest and pre-fasting seasons which may enhance the

1  
2  
3 consumption of more diversified food groups. Due to this seasonal variation and cross-sectional  
4 nature of the study design, the study results should be interpreted with caution.  
5  
6

7  
8 The study results showed that only 31.6% of children aged 6-23 months meet MAD. This is in line  
9 with study reports from the analysis of the Gahanna demographic survey (29.9%) and Nepal (33%)  
10 [27, 28]. This finding is lower from Indonesia (44.9%), China (41.6%), India (35.6%, 37.7%) and  
11 Bangladesh (39.9%) [13-15, 29, 30], but its higher compared with studies done in Philippines,  
12 Pakistan, Nepal, Uganda, and Ethiopia which were (6.7%), (8%), (26.5%), (23-26.3 %) and (6.1%-  
13 7%) respectively [11, 12, 17, 31-33]. The possible reason for variation could be explained by the  
14 differences in the study setting, period, population, and sample size of the studies.  
15  
16

17 Children whose parents have formal education had more odds of meeting MAD compared with  
18 children whose parents have no formal education. Mothers who had secondary education and  
19 above were more likely to provide MAD to their children and children whose fathers attained  
20 primary education level had more odds to meet MAD. This is consistent with Nepal [27], Indonesia  
21 [34], Bangladesh [15], Ghana [28], Tanzania [35] and Ethiopia [16]. This is maybe due to educated  
22 parents may easily capture infant and young child feeding counseling and advice messages  
23 provided at health facilities and other media outlets compared with an uneducated parent. Besides,  
24 educated parents are more productive, capable, and join to better-paid jobs that have a positive  
25 impact on improving household income and household food security. This leads to parents provide  
26 adequate diversified and high-quality diet to their children. Hence, Policymakers should strengthen  
27 people to achieve higher level grades, and an appropriate IYCF education intervention targeted at  
28 uneducated parents should be designed.  
29  
30  
31  
32  
33  
34  
35  
36  
37  
38  
39  
40  
41  
42  
43  
44  
45  
46  
47  
48  
49  
50  
51

52 Mothers who had four and above ANC visits and those mothers who utilized child growth  
53 monitoring service were two times more likely to provide MAD to their children compared with  
54  
55  
56  
57  
58  
59  
60

1  
2  
3 their counterparts. This is consistent with Nepal [5] and Philippine [11]. This indicated that IYCF  
4 counseling and advice provided during ANC follow up and child growth monitoring contact points  
5 have a positive impact on infant and young child feeding practice. Therefore, strengthening  
6 maternal and child health service utilization has essential roles to increase consumption of  
7 minimum acceptable diet.  
8  
9

10  
11  
12 Children aged 12-17 and 18-23 months had more odds of meeting MAD compared with children  
13 6-11 months of age. The same results were reported in Gahanna [28], Uganda [33], Indonesia [13],  
14 and Pakistan [31, 36]. This implies that children aged 6-11 months introduce to less diversified  
15 complementary food and they have a more risk of malnutrition compared with older-age children.  
16 Hence, the mother should be advised and counseled on age-appropriate infant and young child  
17 complementary feeding practices.  
18  
19

20  
21  
22 Mothers who received infant and young child feeding advice from health extension workers were  
23 provided MAD to their children. This indicated that community-based health extension program  
24 has a significant contribution to improving age-appropriate child feeding practice. Also, health  
25 extension workers have a positive impact on the improvement of maternal and child health service  
26 utilization, sanitation, and knowledge of health-seeking behaviors [37, 38]. Therefore, health  
27 extension workers program is essential to reduce child growth faltering and inappropriate child  
28 feeding practice. Children free of illness two weeks before the survey had more odds of meeting  
29 MAD. This is because infection or illness reduces the children's appetite or dietary intake from a  
30 variety of food groups and children may prefer breastfeeding over additional food. Hence, a mother  
31 should be advised to provide her child more diversified diet and to increase the frequency of  
32 feeding during illness. Children from a household with a home garden had more odds of meeting  
33 MAD. Because in resource-limited settings, home garden farming is positively associated with  
34  
35  
36  
37  
38  
39  
40  
41  
42  
43  
44  
45  
46  
47  
48  
49  
50  
51  
52  
53  
54  
55  
56  
57  
58  
59  
60

1  
2  
3 household food security, increase income, and dietary diversity [39]. The home garden practice is  
4 also associated with increased food availability and accessibility because a household with home  
5 garden farming can access a variety of food groups from backyard farming. Therefore, in resource-  
6 poor counties, urban agriculture has a positive contribution to infant and young child diet quality.  
7  
8  
9  
10  
11

## 12 **Conclusion**

13  
14  
15  
16 Generally, the study result revealed that less than one-third (31.6%) of infants and young children  
17 aged 6-23 months meet the minimum acceptable diet. This put children aged 6-23 months at higher  
18 risk of stunted growth, poor mental development, and adverse health outcomes in the life cycle.  
19  
20 The study also assessed factors associated with the meeting of MAD; mother and father education,  
21 age of the child, ANC follow up during pregnancy, child growth monitoring, wealth index, IYCF  
22 advice, history of illness within two weeks prior to the survey, and presence of home garden was  
23 identified predictors of MAD. Various IYCF education intervention strategies appropriate to the  
24 local context should be provided and attention should be given to parent education level, backyard  
25 farming, income-generating activities, and maternal and child health service utilization.  
26  
27  
28  
29  
30  
31  
32  
33  
34  
35  
36

37 **Ethical Consideration:** Institutional Health Research Ethics Review Committee (IHRERC) of  
38 Haramaya University, College of Medicine and Health Sciences ethically approved the study  
39 with reference number C/Ac/R/D/01/878/18 and data were collected after informed written  
40 consent taken from study participant.  
41  
42  
43  
44  
45

46 **Patient consent for publication:** Not required

47 **Data availability:** Data used to analyze this study are found from the corresponding author

48 **Conflict of interest:** None declared

49 **Funding statement:** This research received no specific grant from any funding agency in the  
50 public, commercial or not-for-profit sectors.  
51  
52  
53  
54  
55  
56  
57  
58  
59  
60

1  
2  
3 **Patient and public involvement:** Patients and/or the public were not involved in the design, or  
4  
5  
6  
7  
8  
9  
10  
11  
12  
13  
14  
15  
16  
17  
18  
19  
20  
21  
22  
23  
24  
25  
26  
27  
28  
29  
30  
31  
32  
33  
34  
35  
36  
37  
38  
39  
40  
41  
42  
43  
44  
45  
46  
47  
48  
49  
50  
51  
52  
53  
54  
55  
56  
57  
58  
59  
60

conduct, or reporting, or dissemination plans of this research.

**Author contributions:** Conception and original draft writing: AM, Study design, data analysis, and interpretation: AM, GE, AS, BK, MA, LG, and AB, Critically review initial draft and finalizing manuscript: GE, AS, BK, MA, LG, and AB, Preparing manuscript: AM and AS. All authors reviewed and approved the final manuscript.

**Acknowledgments:** We thank Haramaya University for giving us this opportunity. Our gratitude also goes to Debre Berhan Town Health Office, Kebeles administrators, and Health extension workers providing the necessary information.

## References

1. UNICEF, UNICEF's Approach to Scaling Up Nutrition for Mothers and their Children. 2015.
2. WHO, Essential Nutrition Actions: improving maternal, newborn, infant and young child health and nutrition. World Health Organization, Geneva, Switzerland. 2013.
3. CARE, Infant and Young Child Feeding Practices: Collecting and Using Data: A Step-byStep Guide. Cooperative for Assistance and Relief Everywhere, Inc. (CARE). 2010. 2010.
4. USAID., USAID'S infant and young child nutrition project Ethiopia 2011
5. Kahnal, V., et al., Determinants of complementary feeding practices among Nepalese children aged 6–23 months: findings from demographic and health survey 2011. BMC pediatrics, 2013. 13(1): p. 131.

- 1  
2  
3 6. Huffman, S.L. and D. Schofield, Consequences of Malnutrition in Early Life and Strategies  
4 to Improve Maternal and Child Diets through Targeted Fortified Products. *Maternal &*  
5  
6 *Child Nutrition*, 2011. 7.  
7  
8
- 9  
10 7. Akombi, B.J., et al., Stunting, Wasting and Underweight in Sub-Saharan Africa: A  
11  
12 Systematic Review. *International Journal of Environmental Research and Public Health*,  
13  
14 2017. 14(863).  
15
- 16 8. Jones, A.D., et al., World Health Organization infant and young child feeding indicators  
17 and their associations with child anthropometry: a synthesis of recent findings. *Maternal &*  
18  
19 *child nutrition*, 2014. 10(1): p. 1-17.  
20  
21
- 22 9. WHO, Indicators for assessing infant and young child feeding practices Part 1; Definitions.  
23  
24 2008.  
25  
26
- 27 10. WHO, Indicators for assessing infant and young child feeding practices part 2:  
28  
29 measurement: World Health Organization. 2010.  
30  
31
- 32 11. Guirindola, M.O., et al., Determinants of Meeting the Minimum Acceptable Diet Among  
33  
34 Filipino Children Aged 6-23 Months. *Philippine Journal of Science*, 2018. 147 (1): p. 75-  
35  
36 89.  
37  
38
- 39 12. Tassew, A.A., et al., Factors affecting feeding 6–23 months age children according to  
40  
41 minimum acceptable diet in Ethiopia: A multilevel analysis of the Ethiopian Demographic  
42  
43 Health Survey. *PloS one*, 2019. 14(2): p. e0203098.  
44  
45
- 46 13. Ng, C.S., et al., Complementary feeding indicators and determinants of poor feeding  
47  
48 practices in Indonesia: a secondary analysis of 2007 Demographic and Health Survey data.  
49  
50 *Public health nutrition*, 2012. 15(5): p. 827-839.  
51  
52  
53  
54  
55  
56  
57  
58  
59  
60

- 1  
2  
3 14. Hipgrave, D.B., et al., Poor complementary feeding practices and high anaemia prevalence  
4 among infants and young children in rural central and western China. *European Journal of*  
5  
6  
7  
8  
9  
10  
11  
12  
13  
14  
15  
16  
17  
18  
19  
20  
21  
22  
23  
24  
25  
26  
27  
28  
29  
30  
31  
32  
33  
34  
35  
36  
37  
38  
39  
40  
41  
42  
43  
44  
45  
46  
47  
48  
49  
50  
51  
52  
53  
54  
55  
56  
57  
58  
59  
60  
14. Hipgrave, D.B., et al., Poor complementary feeding practices and high anaemia prevalence among infants and young children in rural central and western China. *European Journal of Clinical Nutrition* 2014. 68: p. 916-924.
15. Kabir, I., et al., Determinants of inappropriate complementary feeding practices in infant and young children in Bangladesh: secondary data analysis of Demographic Health Survey 2007. *Maternal & child nutrition*, 2012. 8: p. 11-27.
16. Mulat, E., et al., Uptake of minimum acceptable diet among children aged 6–23 months in orthodox religion followers during fasting season in rural area, DEMBECHA, north West Ethiopia. *BMC Nutrition*, 2019. 5(1): p. 18.
17. EDHS, ETHIOPIA Demographic and Health Survey TheDHS Program ICF Rockville, Maryland, USA, 2016.
18. Roba, K.T., et al., Anemia and undernutrition among children aged 6-23 months in two agroecological zones of rural Ethiopia. *Pediatric Health Med Ther*, 2016. 7: p. 131-140.
19. Derso, T., et al., Stunting, wasting and associated factors among children aged 6–24 months in Dabat health and demographic surveillance system site: A community based cross-sectional study in Ethiopia. *Bmc pediatrics*, 2017. 17(1): p. 96.
20. Mulat, E., et al., Uptake of minimum acceptable diet among children aged 6–23 months in orthodox religion followers during fasting season in rural area, DEMBECHA, north West Ethiopia. *BMC Nutrition*, 2019. 5(18).
21. Dangura, D. and S. Gebremedhin, Dietary diversity and associated factors among children 6-23 months of age in Gorche district, Southern Ethiopia: Cross-sectional study. *BMC Pediatrics* 2017. 17(6): p. 2-7.



- 1  
2  
3 22. Mitchodigni, I.M., et al., Complementary feeding practices: determinants of dietary  
4 diversity and meal frequency among children aged 6–23 months in Southern Benin. 2017.  
5  
6 9: p. 1117-1130.  
7  
8  
9  
10 23. Wondu, G.B. and N. Yang, Determinants of Suboptimal Complementary Feeding Practices  
11 among Children Aged 6-23 Months in Selected Urban Slums of Oromia Zones (Ethiopia).  
12 Journal of Nutrition & Food Sciences, 2017. 7(3): p. 1-10.  
13  
14  
15  
16  
17 24. Coates, J., et al., Household Food Insecurity Access Scale (HFIAS) for Measurement of  
18 Food Access: Indicator Guide: Food and Nutrition Technical Assistance 2007.  
19  
20  
21 25. von Elm E, et al., The Strengthening the Reporting of Observational Studies in  
22 Epidemiology (STROBE) Statement: guidelines for reporting observational studies.  
23  
24  
25  
26 26. Saaka, M., et al., Magnitude and factors associated with appropriate complementary  
27 feeding among children 6–23 months in Northern Ghana. BMC Nutrition 2016. 2(2).  
28  
29  
30  
31 27. Gautam, K.P., et al., Determinants of infant and young child feeding practices in  
32 Rupandehi, Nepal. BMC Research Notes, 2016. 9(135): p. 2-7.  
33  
34  
35 28. Issaka, A.I., et al., Determinants of inadequate complementary feeding practices among  
36 children aged 6–23 months in Ghana. Public Health Nutrition, 2014. 18(4): p. 669-678.  
37  
38  
39  
40 29. Ahmad, I., et al., Complementary feeding practices among children aged 6–23 months in  
41 Aligarh, Uttar Pradesh. Journal of Family Medicine and Primary Care, 2017. 6(2): p. 386-  
42 91.  
43  
44  
45  
46  
47 30. Singhal, P., et al., Status of infant and young child feeding practices with special emphasis  
48 on breast feeding in an urban area of Meerut. IOSR Journal of Dental and Medical  
49 Sciences, 2013. 7(4): p. 7-11.  
50  
51  
52  
53  
54  
55  
56  
57  
58  
59  
60

- 1  
2  
3 31. Khanal, V., et al., Determinants of complementary feeding practices among Nepalese  
4 children aged 6-23 months: findings from Demographic and Health Survey 2011. *BMC*  
5 *Pediatr*, 2013. 13: p. 131.  
6  
7  
8  
9  
10 32. Khan, G.N., et al., Determinants of infant and young child feeding practices by mothers in  
11 two rural districts of Sindh, Pakistan: a cross-sectional survey. *International Breastfeeding*  
12 *Journal* 2017. 12(40): p. 2-8.  
13  
14  
15  
16 33. Mokori, A., et al., Child factors associated with complementary feeding practices in  
17 Uganda. *South African Journal of Clinical Nutrition*, 2017. 30 (1): p. 7-14.  
18  
19  
20  
21 34. Liben, M.L., et al., Factors Associated with Dietary Diversity among Children of Agro  
22 Pastoral Households in Afar Regional State, Northeastern Ethiopia. *Academic Journal of*  
23 *Pediatrics & Neonatology*, 2017. 5(3).  
24  
25  
26  
27 35. Victor, R., et al., Factors associated with inappropriate complementary feeding practices  
28 among children aged 6–23 months in Tanzania. *Maternal and Child Nutrition*, 2012.  
29  
30  
31  
32 36. Na, M., et al., Risk factors of poor complementary feeding practices in Pakistani children  
33 aged 6-23 months: A multilevel analysis of the Demographic and Health Survey 2012-  
34 2013. *Matern Child Nutr*, 2017. 13 Suppl 2(Suppl 2).  
35  
36  
37  
38 37. Medhanyie, A., et al., The role of health extension workers in improving utilization of  
39 maternal health services in rural areas in Ethiopia: a cross sectional study. *BMC health*  
40 *services research*, 2012. 12(1): p. 1-9.  
41  
42  
43  
44 38. Assefa, Y., et al., Community health extension program of Ethiopia, 2003–2018: successes  
45 and challenges toward universal coverage for primary healthcare services. *Globalization*  
46 *and Health*, 2019. 15(1): p. 1-11.  
47  
48  
49  
50  
51  
52  
53  
54  
55  
56  
57  
58  
59  
60

- 1  
2  
3 39. Rammohan, A., et al., Home gardens as a predictor of enhanced dietary diversity and food  
4 security in rural Myanmar. BMC public health, 2019. 19(1): p. 1-13.  
5  
6  
7  
8  
9

10  
11 **Figure legend**  
12

13  
14 Figure 1: Food groups consumed by infants and young children aged 6-23 months in Debre  
15 Berhan Town, Ethiopia, February 2018.  
16

17  
18 Figure 2: MAD distribution by sex and age group of infant and young children aged 6-23 months  
19 in Debre Berhan Town, Ethiopia 2018  
20  
21  
22  
23  
24  
25  
26  
27  
28  
29  
30  
31  
32  
33  
34  
35  
36  
37  
38  
39  
40  
41  
42  
43  
44  
45  
46  
47  
48  
49  
50  
51  
52  
53  
54  
55  
56  
57  
58  
59  
60

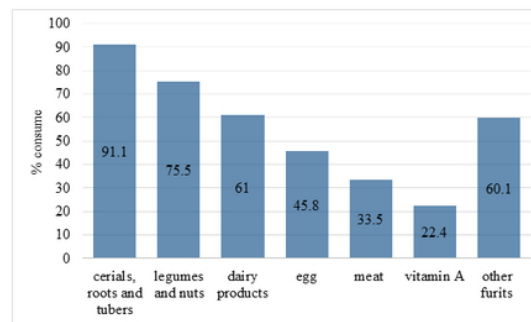

Food groups consumed by infants and young children aged 6-23 months in Debre Berhan Town, Ethiopia, February 2018

68x45mm (300 x 300 DPI)

1  
2  
3  
4  
5  
6  
7  
8  
9  
10  
11  
12  
13  
14  
15  
16  
17  
18  
19  
20  
21  
22  
23  
24  
25  
26  
27  
28  
29  
30  
31  
32  
33  
34  
35  
36  
37  
38  
39  
40  
41  
42  
43  
44  
45  
46  
47  
48  
49  
50  
51  
52  
53  
54  
55  
56  
57  
58  
59  
60

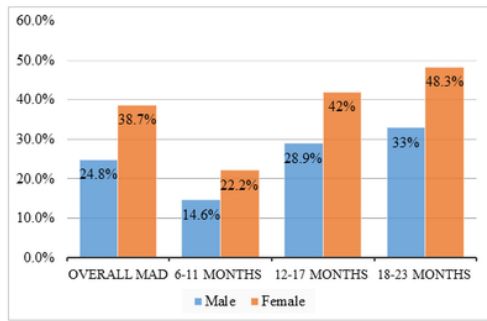

MAD distribution by sex and age group of infant and young children aged 6-23 months in Debre Berhan Town, Ethiopia 2018

68x45mm (300 x 300 DPI)

# Reporting checklist for cross sectional study.

Based on the STROBE cross sectional guidelines.

## Instructions to authors

Complete this checklist by entering the page numbers from your manuscript where readers will find each of the items listed below.

Your article may not currently address all the items on the checklist. Please modify your text to include the missing information. If you are certain that an item does not apply, please write "n/a" and provide a short explanation.

Upload your completed checklist as an extra file when you submit to a journal.

In your methods section, say that you used the STROBE cross sectional reporting guidelines, and cite them as:

von Elm E, Altman DG, Egger M, Pocock SJ, Gøtzsche PC, Vandenbroucke JP. The Strengthening the Reporting of Observational Studies in Epidemiology (STROBE) Statement: guidelines for reporting observational studies.

|                           |                     | Reporting Item                                                                                                                  | Page Number |
|---------------------------|---------------------|---------------------------------------------------------------------------------------------------------------------------------|-------------|
| <b>Title and abstract</b> |                     |                                                                                                                                 |             |
| Title                     | <a href="#">#1a</a> | Indicate the study's design with a commonly used term in the title or the abstract                                              | 1           |
| Abstract                  | <a href="#">#1b</a> | Provide in the abstract an informative and balanced summary of what was done and what was found                                 | 1&2         |
| <b>Introduction</b>       |                     |                                                                                                                                 |             |
| Background / rationale    | <a href="#">#2</a>  | Explain the scientific background and rationale for the investigation being reported                                            | 3 &4        |
| Objectives                | <a href="#">#3</a>  | State specific objectives, including any prespecified hypotheses                                                                | 4           |
| <b>Methods</b>            |                     |                                                                                                                                 |             |
| Study design              | <a href="#">#4</a>  | Present key elements of study design early in the paper                                                                         | 4           |
| Setting                   | <a href="#">#5</a>  | Describe the setting, locations, and relevant dates, including periods of recruitment, exposure, follow-up, and data collection | 4 & 5       |
| Eligibility criteria      | <a href="#">#6a</a> | Give the eligibility criteria, and the sources and methods of selection of participants.                                        | 5           |

|    |                     |                      |                                                                                                |
|----|---------------------|----------------------|------------------------------------------------------------------------------------------------|
| 1  |                     | <a href="#">#7</a>   | Clearly define all outcomes, exposures, predictors, potential confounders, and effect          |
| 2  |                     |                      | modifiers. Give diagnostic criteria, if applicable NA                                          |
| 3  |                     |                      |                                                                                                |
| 4  |                     |                      |                                                                                                |
| 5  | Data sources /      | <a href="#">#8</a>   | For each variable of interest give sources of data and details of methods of assessment        |
| 6  | measurement         |                      | (measurement). Describe comparability of assessment methods if there is more than one          |
| 7  |                     |                      | group. Give information separately for for exposed and unexposed groups if applicable. NA      |
| 8  |                     |                      |                                                                                                |
| 9  |                     |                      |                                                                                                |
| 10 | Bias                | <a href="#">#9</a>   | Describe any efforts to address potential sources of bias                                      |
| 11 |                     |                      |                                                                                                |
| 12 |                     |                      |                                                                                                |
| 13 | Study size          | <a href="#">#10</a>  | Explain how the study size was arrived at 5                                                    |
| 14 |                     |                      |                                                                                                |
| 15 | Quantitative        | <a href="#">#11</a>  | Explain how quantitative variables were handled in the analyses. If applicable, describe       |
| 16 | variables           |                      | which groupings were chosen, and why                                                           |
| 17 |                     |                      |                                                                                                |
| 18 |                     |                      |                                                                                                |
| 19 | Statistical methods | <a href="#">#12a</a> | Describe all statistical methods, including those used to control for confounding 7            |
| 20 |                     |                      |                                                                                                |
| 21 | Statistical methods | <a href="#">#12b</a> | Describe any methods used to examine subgroups and interactions NA                             |
| 22 |                     |                      |                                                                                                |
| 23 |                     |                      |                                                                                                |
| 24 | Statistical methods | <a href="#">#12c</a> | Explain how missing data were addressed 5                                                      |
| 25 |                     |                      |                                                                                                |
| 26 | Statistical methods | <a href="#">#12d</a> | If applicable, describe analytical methods taking account of sampling strategy                 |
| 27 |                     |                      |                                                                                                |
| 28 | Statistical methods | <a href="#">#12e</a> | Describe any sensitivity analyses NA                                                           |
| 29 |                     |                      |                                                                                                |
| 30 |                     |                      |                                                                                                |
| 31 | <b>Results</b>      |                      |                                                                                                |
| 32 |                     |                      |                                                                                                |
| 33 | Participants        | <a href="#">#13a</a> | Report numbers of individuals at each stage of study—eg numbers potentially eligible,          |
| 34 |                     |                      | examined for eligibility, confirmed eligible, included in the study, completing follow-up, and |
| 35 |                     |                      | analysed. Give information separately for for exposed and unexposed groups if applicable.      |
| 36 |                     |                      | NA                                                                                             |
| 37 |                     |                      |                                                                                                |
| 38 |                     |                      |                                                                                                |
| 39 |                     |                      |                                                                                                |
| 40 | Participants        | <a href="#">#13b</a> | Give reasons for non-participation at each stage NA                                            |
| 41 |                     |                      |                                                                                                |
| 42 | Participants        | <a href="#">#13c</a> | Consider use of a flow diagram NA                                                              |
| 43 |                     |                      |                                                                                                |
| 44 |                     |                      |                                                                                                |
| 45 | Descriptive data    | <a href="#">#14a</a> | Give characteristics of study participants (eg demographic, clinical, social) and information  |
| 46 |                     |                      | on exposures and potential confounders. Give information separately for exposed and            |
| 47 |                     |                      | unexposed groups if applicable. 8-10                                                           |
| 48 |                     |                      |                                                                                                |
| 49 |                     |                      |                                                                                                |
| 50 | Descriptive data    | <a href="#">#14b</a> | Indicate number of participants with missing data for each variable of interest NA             |
| 51 |                     |                      |                                                                                                |
| 52 |                     |                      |                                                                                                |
| 53 | Outcome data        | <a href="#">#15</a>  | Report numbers of outcome events or summary measures. Give information separately for          |
| 54 |                     |                      | exposed and unexposed groups if applicable. NA                                                 |
| 55 |                     |                      |                                                                                                |
| 56 |                     |                      |                                                                                                |
| 57 |                     |                      |                                                                                                |
| 58 |                     |                      |                                                                                                |
| 59 |                     |                      |                                                                                                |
| 60 |                     |                      |                                                                                                |

|    |                    |                      |                                                                                                  |
|----|--------------------|----------------------|--------------------------------------------------------------------------------------------------|
| 1  | Main results       | <a href="#">#16a</a> | Give unadjusted estimates and, if applicable, confounder-adjusted estimates and their            |
| 2  |                    |                      | precision (eg, 95% confidence interval). Make clear which confounders were adjusted for and      |
| 3  |                    |                      | why they were included 10-12                                                                     |
| 4  |                    |                      |                                                                                                  |
| 5  |                    |                      |                                                                                                  |
| 6  | Main results       | <a href="#">#16b</a> | Report category boundaries when continuous variables were categorized                            |
| 7  |                    |                      |                                                                                                  |
| 8  |                    |                      |                                                                                                  |
| 9  | Main results       | <a href="#">#16c</a> | If relevant, consider translating estimates of relative risk into absolute risk for a meaningful |
| 10 |                    |                      | time period NA                                                                                   |
| 11 |                    |                      |                                                                                                  |
| 12 | Other analyses     | <a href="#">#17</a>  | Report other analyses done—e.g., analyses of subgroups and interactions, and sensitivity         |
| 13 |                    |                      | analyses NA                                                                                      |
| 14 |                    |                      |                                                                                                  |
| 15 |                    |                      |                                                                                                  |
| 16 | <b>Discussion</b>  |                      |                                                                                                  |
| 17 |                    |                      |                                                                                                  |
| 18 |                    |                      |                                                                                                  |
| 19 | Key results        | <a href="#">#18</a>  | Summarise key results with reference to study objectives 13-16                                   |
| 20 |                    |                      |                                                                                                  |
| 21 | Limitations        | <a href="#">#19</a>  | Discuss limitations of the study, taking into account sources of potential bias or imprecision.  |
| 22 |                    |                      | Discuss both direction and magnitude of any potential bias. 16                                   |
| 23 |                    |                      |                                                                                                  |
| 24 |                    |                      |                                                                                                  |
| 25 | Interpretation     | <a href="#">#20</a>  | Give a cautious overall interpretation considering objectives, limitations, multiplicity of      |
| 26 |                    |                      | analyses, results from similar studies, and other relevant evidence. 13                          |
| 27 |                    |                      |                                                                                                  |
| 28 |                    |                      |                                                                                                  |
| 29 | Generalisability   | <a href="#">#21</a>  | Discuss the generalisability (external validity) of the study results 16                         |
| 30 |                    |                      |                                                                                                  |
| 31 | <b>Other</b>       |                      |                                                                                                  |
| 32 |                    |                      |                                                                                                  |
| 33 | <b>Information</b> |                      |                                                                                                  |
| 34 |                    |                      |                                                                                                  |
| 35 | Funding            | <a href="#">#22</a>  | Give the source of funding and the role of the funders for the present study and, if applicable, |
| 36 |                    |                      | for the original study on which the present article is based 16                                  |
| 37 |                    |                      |                                                                                                  |
| 38 |                    |                      |                                                                                                  |

39 None The STROBE checklist is distributed under the terms of the Creative Commons Attribution License CC-BY. This checklist can be  
 40 completed online using <https://www.goodreports.org/>, a tool made by the [EQUATOR Network](#) in collaboration with [Penelope.ai](#)  
 41  
 42  
 43  
 44  
 45  
 46  
 47  
 48  
 49  
 50  
 51  
 52  
 53  
 54  
 55  
 56  
 57  
 58  
 59



# BMJ Open

## Minimum Acceptable Diet and Associated Factors among Infants and Young Children aged 6-23 months in Amhara Region, Central Ethiopia: A Community-Based Cross-Sectional Study

|                                 |                                                                                                                                                                                                                                                                                                                                                                                                  |
|---------------------------------|--------------------------------------------------------------------------------------------------------------------------------------------------------------------------------------------------------------------------------------------------------------------------------------------------------------------------------------------------------------------------------------------------|
| Journal:                        | <i>BMJ Open</i>                                                                                                                                                                                                                                                                                                                                                                                  |
| Manuscript ID                   | bmjopen-2020-044284.R2                                                                                                                                                                                                                                                                                                                                                                           |
| Article Type:                   | Original research                                                                                                                                                                                                                                                                                                                                                                                |
| Date Submitted by the Author:   | 15-Apr-2021                                                                                                                                                                                                                                                                                                                                                                                      |
| Complete List of Authors:       | Molla, Abebaw; Mizan-Tepi University, Egata, Gudina ; Addis Ababa University College of Health Sciences, Public health<br>Getacher, Lemma ; Debre Berhan University, Public Health, Nutrition<br>Kebede , Bezie; Mizan-Tepi University<br>Sayih, Alemayehu; Mizan-Tepi University<br>Arega, Mikyas; Debre Berhan University, Public Health, Nutrition<br>Bante, Agegnehu; Arba Minch University, |
| <b>Primary Subject Heading</b>: | Nutrition and metabolism                                                                                                                                                                                                                                                                                                                                                                         |
| Secondary Subject Heading:      | Nutrition and metabolism                                                                                                                                                                                                                                                                                                                                                                         |
| Keywords:                       | NUTRITION & DIETETICS, Community child health < PAEDIATRICS, PUBLIC HEALTH                                                                                                                                                                                                                                                                                                                       |
|                                 |                                                                                                                                                                                                                                                                                                                                                                                                  |

SCHOLARONE™  
Manuscripts



I, the Submitting Author has the right to grant and does grant on behalf of all authors of the Work (as defined in the below author licence), an exclusive licence and/or a non-exclusive licence for contributions from authors who are: i) UK Crown employees; ii) where BMJ has agreed a CC-BY licence shall apply, and/or iii) in accordance with the terms applicable for US Federal Government officers or employees acting as part of their official duties; on a worldwide, perpetual, irrevocable, royalty-free basis to BMJ Publishing Group Ltd ("BMJ") its licensees and where the relevant Journal is co-owned by BMJ to the co-owners of the Journal, to publish the Work in this journal and any other BMJ products and to exploit all rights, as set out in our [licence](#).

The Submitting Author accepts and understands that any supply made under these terms is made by BMJ to the Submitting Author unless you are acting as an employee on behalf of your employer or a postgraduate student of an affiliated institution which is paying any applicable article publishing charge ("APC") for Open Access articles. Where the Submitting Author wishes to make the Work available on an Open Access basis (and intends to pay the relevant APC), the terms of reuse of such Open Access shall be governed by a Creative Commons licence – details of these licences and which [Creative Commons](#) licence will apply to this Work are set out in our licence referred to above.

Other than as permitted in any relevant BMJ Author's Self Archiving Policies, I confirm this Work has not been accepted for publication elsewhere, is not being considered for publication elsewhere and does not duplicate material already published. I confirm all authors consent to publication of this Work and authorise the granting of this licence.

1  
2  
3 **Minimum Acceptable Diet and Associated Factors among Infants and Young Children aged**  
4 **6-23 months in Amhara Region, Central Ethiopia: Community-Based Cross-Sectional Study**  
5  
6  
7

8 Abebaw Molla<sup>1\*</sup>, Gudina Egata<sup>2</sup>, Lemma Getacher<sup>3</sup>, Bezie Kebede<sup>4</sup>, Alemayehu Sayih<sup>1</sup>, Mikyas  
9 Arega<sup>5</sup>, Agegnehu Bante<sup>6</sup>  
10  
11

12  
13 <sup>1</sup>School of Public Health, College of Health Sciences, Mizan Tepi University, Ethiopia  
14

15 <sup>2</sup>School of Public Health, College of Health and Medical Sciences, Haramaya University, Ethiopia  
16

17 <sup>3</sup>Department of Public Health, College of Medicine and Health Sciences, Debre Berhan University,  
18 Ethiopia  
19  
20

21 <sup>4</sup>Department of Pharmacy, College of Health Sciences, Mizan-Tepi University, Ethiopia  
22  
23

24 <sup>5</sup>Department of Midwifery, College of Medicine and Health Sciences, Debre Berhan University,  
25 Ethiopia  
26  
27

28 <sup>6</sup>School of Nursing, College of Medicine and Health Sciences, Arba Minch University, Arba  
29 Minch Ethiopia  
30  
31

32  
33 **Author address**  
34

35  
36 Abebaw Molla: [abebawtsehay1@gmail.com](mailto:abebawtsehay1@gmail.com) , Gudina Egata: [Gudina\\_egata@yahoo.com](mailto:Gudina_egata@yahoo.com), Lemma  
37 Getacher: [lemmagetacher@gmail.com](mailto:lemmagetacher@gmail.com), Bezie Kebede: [beza.kebede21@gmail.com](mailto:beza.kebede21@gmail.com), Alemayehu  
38 Sayih: [Alex.sayihalem2012@gmail.com](mailto:Alex.sayihalem2012@gmail.com), Agegnehu Bante: [agegnehubante@gmail.com](mailto:agegnehubante@gmail.com)  
39  
40  
41

42  
43 \* Corresponding author  
44

45 E-mail address: [abebawtsehay1@gmail.com](mailto:abebawtsehay1@gmail.com) (AM)  
46

47 **Word count=4892**  
48  
49

50 **Abstract**  
51

52  
53 **Objective:** The main objective of this study was to assess the prevalence of a minimum acceptable  
54 diet and associated factors.  
55  
56  
57  
58  
59

1  
2  
3 **Design:** Community-based cross-sectional study  
4  
5

6 **Setting:** Debre Berhan Town, Ethiopia.  
7  
8

9 **Participants:** An aggregate of 531 infants and young children mother/caregiver pairs participated  
10 in this study. A one-stage cluster sampling method was used to select study participants and  
11 clusters were selected using a lottery method. Descriptive statistics were calculated for all study  
12 variables. Statistical analysis was performed on data to determine which variables are associated  
13 with MAD and the results of the adjusted odds ratio with 95% CI. P-value of < 0.05 considered  
14 statistically significant.  
15  
16  
17  
18  
19  
20  
21  
22

23 **Primary outcome:** Prevalence of minimum acceptable diet and associated factors  
24  
25

26 **Results:** The overall prevalence of minimum acceptable diet was 31.6 % (95% CI: 27.7, 35.2).  
27 Having mother attending secondary (AOR=4.9, 95% CI: 1.3, 18.9) and college education  
28 (AOR=6.4, 95% CI: 1.5, 26.6), paternal primary education (AOR=1.3, 95% CI: 1.5, 2.4), grouped  
29 in the aged group of 12-17 months (AOR=1.8, 95% CI: (1.0, 3.4) and 18-23 months (AOR=2.2,  
30 95%CI: 1.2, 3.9), having four ANC visits (AOR=2.0, 95% CI: 1.0, 3.9), utilizing growth  
31 monitoring (AOR=1.8, 95% CI: 1.1, 2.9), no history of illness two weeks before the survey  
32 (AOR=2.9, 95% CI: 1.5, 6.0) and living in the household with home garden (AOR=2.5, 95% CI:  
33 1.5, 4.3) were positively associated with increase the odds of minimum acceptable diet.  
34  
35  
36  
37  
38  
39  
40  
41  
42  
43  
44

45 **Conclusion:** Generally, the result of this study showed that the prevalence of minimum acceptable  
46 was very low. Parent educational status, ANC visits, IYCF advice, child growth monitoring  
47 practice, age of a child, a child has no history of illness two weeks before the survey, and home  
48 gardening practice were the predictors of minimum acceptable diet. Therefore, comprehensive  
49 intervention strategies suitable to the local context are required to improve the provision of MAD.  
50  
51  
52  
53  
54  
55  
56  
57  
58  
59  
60

**Key Words:** Associated factors, Debre Berhan Town, Ethiopia, Infants and Young Children aged 6-23 months, Minimum Acceptable Diet

## Article summary

### Strength and limitation of the study

- The study was conducted at the community level, which increases the probability of generalizability to the entire population that the sample was drawn.
- This study used relatively a large sample size using a design effect to increase the power of the study and its generalizability
- This study used a multivariate logistic regression analysis to control all possible confounders.
- Seasonal variation, social desirability bias, and recall bias were the limitation of the study.

## Introduction

Proper nutrition from conception to 24 months of age is a critical window period that determines the survival, health, and nutritional status of a child [1]. The introduction of appropriate nutrition at age six months together with sustaining breastfeeding until two years of age warrants optimal growth, development, and maintain healthy life throughout the life cycle [2]. In contrast, inappropriate infant and young child feeding practices lead to stunted growth and poor cognitive development [3].

In many resource-limited countries, like Ethiopia high rate of growth failure occurs within the first 24 months of age and thereafter decreases [4], and this is mainly because of resource limitations and inappropriate child feeding practices [5]. Consumption of acceptable dietary

1  
2  
3 standards has numerous benefits; including enhanced linear growth, better cognitive development,  
4 and high school achievement, reduced risk of non-communicable disease, increased body  
5 immunity system, and productivity during adult life [1-4, 6, 7]. Meeting a minimum acceptable  
6 diet also essential to reduce macronutrient and micronutrient deficiencies that lead to improving  
7 linear growth status [8, 9]. On the other hand, the unmet minimum acceptable diet standard has  
8 devastating, long-term, and irreversible health outcomes such as stunted growth. Moreover,  
9 stunted children become small adults with different adverse health effects in their life course [2,  
10 4].

11  
12 The minimum acceptable diet (MAD) is an infant and young child feeding indicator designed to  
13 measure appropriate complementary feeding patterns of children aged 6-23 months. It is a  
14 composite indicator of the minimum meal frequency and minimum dietary diversity. According  
15 to the WHO definition, MAD is the proportion of children aged 6-23 months who had consumed  
16 the minimum meal frequency (MMF) and minimum dietary diversity (MDD) during the previous  
17 day or night [10]. The minimum dietary diversity is used to measure the quality of infant and young  
18 child's complementary diet of child diet, while minimum meal frequency is used as a proxy  
19 measure of energy intake or quantity of food consumed other than breast milk. Furthermore, MAD  
20 assesses both micronutrient adequacy and quantity of food consumed during the previous day or  
21 night and measures appropriate complementary feeding practices. Similarly, MAD measures  
22 multiple dimensions of infant and young child diet; those children aged 6-23 months who meet  
23 both macronutrient and micronutrient requirements, but MDD and MMF measure one dimension  
24 of infants and young child diets; those infants and young children who meet micronutrients and  
25 macronutrient respectively [9, 10].

1  
2  
3 To summarize, assessing MAD is very important for measuring both energy intake and  
4 micronutrient adequacy of a child simultaneously than one dimension of diet (diet quality or  
5 quantity of diet). However, studies in different areas including Ethiopia showed that consuming  
6 the recommended minimum acceptable diet in children aged 6-23 months greatly vary from area  
7 to area with the lowest proportion of MAD (8%, 6.7%, and 6.1%) was reported in Pakistan,  
8 Philippines, and Ethiopia, respectively [5, 11, 12]. On the other hand, the highest prevalence of  
9 minimum acceptable diet (44.9%, 41.6%, and 39.9%) was reported in Indonesia, China, and  
10 Bangladesh respectively [13-15].  
11  
12  
13  
14  
15  
16  
17  
18  
19  
20  
21

22 Likewise, in Ethiopia, the proportion of children aged 6-23 months who consume the minimum  
23 acceptable diet standard has been reported [12, 16]. However, the prevalence of MAD in the  
24 Ethiopian demographic and health survey (EDHS) was the national average estimate derived from  
25 a sample population vary with dietary habits, culture, geographical setting, socioeconomic status,  
26 residence, educational status, access to health services, and safe drinking water. Besides, the report  
27 didn't identify all remained potential factors associated with MAD. Furthermore, a study in  
28 northwest Ethiopia was conducted among orthodox religious follower mothers during a fasting  
29 period indicate that orthodox religious followers limit consummation of animal and animal  
30 products. Furthermore, the mother may not prepare a separate dish from animal source food to  
31 their children. As a result, these practices may influence the prevalence of MAD in population,  
32 geographical location, and setting. In contrast, this study was conducted during non-fasting periods  
33 and in an urban population with diverse religions, and relatively it has similar characteristics in  
34 child feeding practice, dietary habits, health service, education, water, and sanitation service.  
35  
36  
37  
38  
39  
40  
41  
42  
43  
44  
45  
46  
47  
48  
49  
50  
51  
52 Macro and micronutrient deficiency are a significant problem in Ethiopia stunting and iron  
53 deficiency anemia remain a burden for infants and young children 6-23 months of age [17]. The  
54  
55  
56  
57  
58  
59  
60

1  
2  
3 prevalence of anemia among children aged 6-23 months reaches 53.7% to 72% [17, 18], and the  
4  
5 prevalence of stunting is 58% [19].  
6  
7

8 In the Amhara region, child malnutrition is a very severe public health problem with the  
9  
10 prevalence of stunting and the infant mortality rate was higher than in other regions in the country.  
11  
12 Also, the Amhara region has a low rate of minimum acceptable diet standard and the highest level  
13  
14 of child undernutrition has been reported [17, 19, 20]. This is maybe because of inappropriate  
15  
16 infant and child feeding practices in the first 1000 days. Therefore, determining the prevalence of  
17  
18 MAD and identifying factors associated with MAD in the study area has an important role to  
19  
20 design cultural, geographical, and situation-specific intervention strategies appropriate to the local  
21  
22 context. This in turn will help to reduce the burden of child undernutrition and other health  
23  
24 problems related to malnutrition in the region including the study area. Therefore, the present study  
25  
26 aimed to assess the prevalence of minimum acceptable diet and associated factors among children  
27  
28 aged 6-23 months in the Amhara region of Ethiopia.  
29  
30  
31  
32  
33

## 34 **Methods**

### 35 **Study design, setting, and period**

36  
37  
38 A community-based cross-sectional study design was used from February to March 2018 in Debre  
39  
40 Berhan Town, North Shewa, Central Ethiopia. The Town is located 130 km away from Addis  
41  
42 Ababa, the capital of Ethiopia. In 2017, the Town has an 88,369 total population, nine kebeles,  
43  
44 one referral hospital, three health centers, and 14 health posts.  
45  
46  
47  
48  
49

### 50 **Study participants and Sampling Technique**

51  
52 All infants and young children 6–23 months with mother/caregiver living in Debre Berhan Town  
53  
54 and randomly selected kebeles were considered as the source and study population for this study  
55  
56  
57  
58  
59  
60



1  
2  
3 respectively. A household considered eligible if the infant and young child aged 6-23 months with  
4 mother /caregiver living for at least six months in the selected kebeles were included in the study.  
5

6  
7 The child was excluded from the study if the mother/caregiver was absent in the household or the  
8 mother/caregiver was unable to respond because of the child's illness or her illness and if the  
9 eligible household was closed after three revisits.  
10  
11

12  
13  
14 The required sample size for the study was calculated using a single population proportion formula  
15 with the following assumptions: the proportion of minimum acceptable diet among infants and  
16 young children was 7% [17], a margin of error of 3%, power of 80%, 95% confidence level, design  
17 effect of 1.5 and 10% non-response rate. The final required sample size for the study was 459  
18 infants and young children aged 6-23 months with a mother/caregiver. A one-stage cluster  
19 sampling method was used to select the study population. The town consists of nine kebeles (the  
20 smallest administrative unit in Ethiopia) and kebeles were considered as a cluster to select the  
21 study population. Among the nine clusters, three clusters were randomly selected and data were  
22 collected from every unit in the selected clusters. The total number of eligible infants and young  
23 children aged 6-23 months with their mother/ caregiver was taken from the health extension  
24 workers (HEWs) record. According to the HEWs record, a total of 577 infants and young children  
25 aged 6-23 months-mother pairs were lived in the selected kebeles/clusters. Even though the final  
26 calculated sample size required for the study was 459 infants and young children aged 6-23 months  
27 pair with mother/caregiver, the total number of 577 infants and young children with  
28 mother/caregiver lived in the selected kebeles/clusters. Because of the nature of the cluster  
29 sampling method, all eligible (577) infants and young children aged 6-23 months with their  
30 mother/caregiver living in the selected clusters were included in the survey.  
31  
32  
33  
34  
35  
36  
37  
38  
39  
40  
41  
42  
43  
44  
45  
46  
47  
48  
49  
50  
51  
52  
53

## 54 **Data collection methods**

55  
56  
57  
58  
59  
60

1  
2  
3 Socio-demographic data were collected using pretested and structured interviewer-administered  
4 questionnaires developed from prior studies [11, 21-23]. The study was conducted per the  
5 Declaration of Helsinki ethical principles for medical research involving human subjects and each  
6 study participant gave informed written consent. The mother/caregiver was interviewed and used  
7 as a primary source of data for the study, but if the mother was absent caregivers were interviewed  
8 to collect the data for the study. Ten diploma and two BSc nurses were trained for data collection  
9 and supervision respectively.  
10

11  
12 Data regarding the household wealth were collected using information from ownerships available  
13 assets; ownership of livestock, agricultural land, electronics, radio, television, refrigerator, car,  
14 bicycle, cart, gold, sofa, source of water, availability of electric city, type of toilet and household  
15 characteristics; type of wall, floor, and ceiling [17].  
16

17  
18 Household food security was measured using Household Food Insecurity Access Scale (HFIAS),  
19 a validated tool developed by Food and Nutrition Technical Assistance (FANTA). The HFIAS is  
20 based on respondent recall in the past 30 days and asks two closely related questions; nine  
21 occurrence questions that examine the experience of food insecurity in the past 4 weeks with two  
22 response choices as 1=yes or 0=no. Each occurrence questions followed by a frequency of  
23 occurrence question that asks the respondent how often the specific condition occurs in the past 4  
24 weeks with the form of Likert scale response as 1= rarely (1 to 2 times in the past 30 days), 2=  
25 sometimes (3 to 10 times in the past 30 days) and 3=often (> 10 times in past 30 days). When  
26 summing up the frequency of occurrence questions, the HFIAS score of household range 0-27 and  
27 severity of household food insecurity increase with increase the HFIAS score [24].  
28

29  
30 Infant and young child feeding practices were collected using WHO infant and young child feeding  
31 (IYCF) standardized questionnaires based on the mother recall of food groups given to her child  
32  
33  
34  
35  
36  
37  
38  
39  
40  
41  
42  
43  
44  
45  
46  
47  
48  
49  
50

1  
2  
3 24 hours before data collection [10]. Finally, all foods the child consumed grouped into seven  
4  
5 food groups: (1) grains, roots, and tubers; (2) legumes and nuts; (3) dairy products; (4) flesh foods;  
6  
7 (5) eggs; (6) vitamin A-rich fruits and vegetables; and (7) other fruits and vegetables [10].  
8  
9

## 10 **Measurements**

11  
12  
13 **Food secure household:** A household that did not experience any food insecurity conditions or  
14  
15 just experience worry, but rarely in the past four weeks [24].  
16

17  
18 **Food insecure household:** A household that experience one of the three levels of food insecurity  
19  
20 conditions; mildly, moderately, and severely food insecurity or access conditions in the past four  
21  
22 weeks categorized as food insecure [24].  
23

24  
25 **Minimum dietary diversity:** consumption of four or more food groups from the WHO  
26  
27 recommended seven food groups within 24 hrs. day or night before the survey [10].  
28

29  
30 **Minimum meal frequency:** the minimum number of times the child consumes solid, semi-solid,  
31  
32 or soft foods (including two milk feeds for non-breastfed children) within 24 hrs. day or night  
33  
34 before the survey. The minimum number of times is two times for breastfed children aged 6-8  
35  
36 months, three times for children aged 9-23 months, and four times for non-breastfed children 6-  
37  
38 23 months of age [10].  
39

40  
41 **Minimum acceptable diet:** consumption of the minimum dietary diversity and minimum meal  
42  
43 frequency within 24 hrs. day or night before the survey [10].  
44

45  
46 **Timely introduction of complementary feeding:** providing a child with solid, semi-solid, or soft  
47  
48 foods in addition to breast milk at the age of 6 months [10].  
49

50  
51 **Household Wealth index:** A proxy measure of living standards derived from information on  
52  
53 ownership available assets and household characteristics and household classified into terciles  
54  
55 category [17].  
56  
57  
58  
59

1  
2  
3 The explanatory variables used for determinant analysis were selected based on similar studies  
4 [11, 15, 25] and the following variables were selected to identify factors associated with MAD.  
5

6  
7 Maternally related variables: Age of mother categorized as: 19-24, 25-29 and  $\geq 30$  years of age;  
8  
9 educational status of mother: no formal education, primary education, secondary education, and  
10 college and above; occupational status: housewife, employed, merchant, and farmer; mother  
11 involvement in deciding on what a child to be feed: involved or not involved; mother has a history  
12 of illness within two weeks before the survey: yes or no; ANC visits during pregnancy: less than  
13 three ANC visits and four and above ANC visits; maternal fruit and vegetable consumption per  
14 week: consume less than three times per week and consume four or more times per week; mother  
15 received infant and young child feeding advice HEWs: yes or no; mother utilize child growth  
16 monitoring and promotion: yes or no; mother with a history of illness two weeks before the survey;  
17 and place of delivery: home delivery or health facility delivery.  
18  
19

20  
21  
22  
23  
24  
25  
26  
27  
28  
29  
30  
31 Father-related variables: Father educational status: have no formal education, primary, secondary,  
32 and college or above and father occupation: employed, merchant, and farmer.  
33

34  
35  
36  
37  
38  
39  
40  
41  
42  
43  
44  
45  
46  
47  
48  
49  
50  
51  
52  
53  
54  
55  
56  
57  
58  
59  
60  
Child-related variables: Child sex: male or female; child age: age 6-11 months, age 12-17 months,  
and age 18-23 months; child initiated to complementary feeding: yes or no; child age at which  
child introduced with complimentary food: < 6 months, at 6 months, and after 6 months; child  
currently bottle feed: yes or no; and child has a history of illness with two weeks before the survey:  
yes or no.

Household related variables: A household wealth index was constructed based on principal  
component analysis (PCA) and the household was categorized into terciles: poor, medium, and  
rich; head of household or a person who is responsible for decision making in a household: father,

1  
2  
3 mother or both; household food security; food secure and food insecure; the presence of home  
4 garden: yes or no; and family size: categorized  $\leq 3$ , 4-5 and  $\geq 6$  family members.

5  
6  
7  
8 Minimum acceptable diet (MAD) was categorized into a dichotomous variable: meeting MAD=1  
9 and not meeting MAD=0. A child who meets both the minimum dietary diversity and minimum  
10 meal frequency was classified as meeting MAD otherwise classified as not meeting MAD.  
11  
12

## 13 14 15 **Quality control**

16  
17  
18 Data collection tools were initially prepared in English and translated into Amharic and then back  
19 to English to check for its consistency. A pretest was done on 5 % of the study sample, two days  
20 of training were given for data collectors and supervisors. The principal investigator and  
21 supervisors have supervised the data collection process. Data were double-entered for cross-  
22 validation.  
23  
24  
25  
26  
27  
28

## 29 30 **Statistical analysis**

31  
32 First, data were checked for accuracy and completeness. Then, data were entered into Epi-Data  
33 Version 3.1 and exported to SPSS version 22 for analysis. A STROBE cross-sectional reporting  
34 checklist was used [26]. Descriptive statistics were used to describe socio-demographic, child  
35 feeding practice, and maternal and child health care unitization variables. Frequency and  
36 percentage were calculated for categorical data and the mean with standard deviation was  
37 calculated for continuous variables.  
38  
39  
40  
41  
42  
43  
44

45  
46 Multicollinearity between explanatory variables was checked with standard error; a variable with  
47 a standard error of  $\geq 2$  was dropped from the analysis. To select the appropriate analysis method  
48 between cluster-level analysis and ordinary logistic regression for a cluster sampling method, first,  
49 we fitted a null model and examined community variation or random effects. The measure of  
50 community variation (random-effects) was estimated with intra-class correlation coefficient (ICC)  
51  
52  
53  
54  
55  
56  
57  
58  
59  
60

1  
2  
3 and the ICC result was 3%. Since the community variation was less than 5%, the use of an ordinary  
4 logistic regression analysis model is sufficient instead of a cluster-level analysis. Bi-variable  
5 logistic regression analysis was done to assess the association between each covariate with MAD.  
6  
7 Covariates with p-value < 0.25 during bi-variable logistic regression analysis; parent education,  
8 maternal fruit consumption, head of household, IYCF advice from HEWs, ANC follow-up, growth  
9  
10 monitoring utilization, age of a child, a child has a history of illness two weeks before the survey,  
11  
12 presence of home garden, household food security, and wealth index were included in a  
13  
14 multivariable logistic regression model to control all possible confounders and to identify factors  
15  
16 significantly associated with MAD. Unadjusted and adjusted odds ratios with a 95% confidence  
17  
18 interval were calculated to estimate the strength association of each explanatory variable with  
19  
20 MAD and if the percentage difference between unadjusted and adjusted odds ratio of a variable  
21  
22 greater than 10%, a variable considered confounder. Variables with P-value < 0.05 in the final  
23  
24 model were declared statistically significant. A two-factor product term was used to test interaction  
25  
26 effects and P value of < 0.05 was considered significant.  
27  
28  
29  
30  
31  
32  
33  
34

## 35 **Results**

### 36 **Socio-demographic characteristics of the study participants**

37  
38 Among 577 infants and young children aged 6-23 months living in the selected clusters, 531  
39  
40 mother-children pairs took part in the study making a response rate of 92.0%. Seven infants and  
41  
42 young children were excluded according to exclusion criteria and thirty-nine study participants  
43  
44 declined to participate in the study. The mean ( $\pm$ SD) age of children was (14.7  $\pm$ 5.1) months and  
45  
46 the mean ( $\pm$ SD) age of mothers/caregivers was 27 ( $\pm$ 4.4) years. Out of the study participants, 500  
47  
48 (94.2%) were married and 467 (87.9%) had formal education (Table1).  
49  
50  
51  
52

53 Table 1: Socio-demographic characteristics of the child with a parent in Debre Berhan Town,  
54  
55 Ethiopia, February 2018 (n=531)  
56  
57  
58  
59  
60

| Characteristics                 | Frequency N (%) |
|---------------------------------|-----------------|
| <b>Maternal age (in years)</b>  |                 |
| 19-24                           | 149 (28.1)      |
| 25-29                           | 253 (47.6)      |
| ≥30                             | 129 (24.3)      |
| <b>Maternal religion</b>        |                 |
| Orthodox                        | 505 (95.1)      |
| Muslim                          | 15 (2.8)        |
| Other*                          | 11 (2.1)        |
| <b>Maternal ethnicity</b>       |                 |
| Amhara                          | 490 (92.3)      |
| Oromo                           | 37 (7)          |
| Other**                         | 4 (0.7)         |
| <b>Maternal level education</b> |                 |
| Have no formal education        | 64 (12)         |
| Primary                         | 137 (25.8)      |
| Secondary                       | 155 (29.2)      |
| College and above               | 175 (33)        |
| <b>Maternal marital status</b>  |                 |

|    |          |            |
|----|----------|------------|
| 1  |          |            |
| 2  |          |            |
| 3  | Single   | 19 (3.6)   |
| 4  |          |            |
| 5  |          |            |
| 6  | Married  | 500 (94.2) |
| 7  |          |            |
| 8  |          |            |
| 9  | Divorced | 7 (1.3)    |
| 10 |          |            |
| 11 |          |            |
| 12 | Widowed  | 5 (0.9)    |
| 13 |          |            |
| 14 |          |            |

---

**Maternal occupation**

|    |           |            |
|----|-----------|------------|
| 15 |           |            |
| 16 |           |            |
| 17 | Housewife | 293 (55.2) |
| 18 |           |            |
| 19 |           |            |
| 20 | Merchant  | 75 (14.1)  |
| 21 |           |            |
| 22 |           |            |
| 23 | Employed  | 147 (27.1) |
| 24 |           |            |
| 25 |           |            |
| 26 | Farmer    | 16 (3)     |
| 27 |           |            |
| 28 |           |            |

---

**Husband educational status (n=500)**

|    |                          |            |
|----|--------------------------|------------|
| 29 |                          |            |
| 30 |                          |            |
| 31 | Have no formal education | 53 (4.4)   |
| 32 |                          |            |
| 33 |                          |            |
| 34 | Primary                  | 110 (22)   |
| 35 |                          |            |
| 36 |                          |            |
| 37 | Secondary                | 162 (32.4) |
| 38 |                          |            |
| 39 |                          |            |
| 40 | College and above        | 206 (41.2) |
| 41 |                          |            |
| 42 |                          |            |

---

**Husband occupation (500)**

|    |          |            |
|----|----------|------------|
| 43 |          |            |
| 44 |          |            |
| 45 |          |            |
| 46 | Employed | 361 (71.6) |
| 47 |          |            |
| 48 |          |            |
| 49 | Merchant | 110 (22)   |
| 50 |          |            |
| 51 |          |            |
| 52 | Farmer   | 29 (5.8)   |
| 53 |          |            |
| 54 |          |            |

---



---

**Family size**

|     |            |
|-----|------------|
| ≤3  | 190 (35.8) |
| 4-5 | 273 (51.4) |
| ≥6  | 68 (12.8)  |

---

**Number of under-five**

|      |            |
|------|------------|
| One  | 430 (81)   |
| ≥Two | 101 (19.2) |

---

**Child age (in completed months)**

|       |            |
|-------|------------|
| 6-11  | 175 (33)   |
| 12-17 | 176 (33.1) |
| 18-23 | 180 (33.9) |

---

**Household wealth index**

|        |            |
|--------|------------|
| Poor   | 188 (34.4) |
| Medium | 178 (33.5) |
| Rich   | 165 (31.1) |

---

 Other\*, Other\*\*

**Infants and young children feeding practices**

Almost all, 526 (99.1%) children ever breastfeeding, and 482(91.2%) initiated breastfeeding within one hour after birth. Nearly fourth-fifth, 424 (79.8%) children exclusively breastfed up to six months and 520 (97.9 %) were introduced to complementary food at six months. A majority of 434 (81.7%) were breastfed before the survey. More than half, 290 (54.6 %) children met

1  
2  
3 minimum meal frequency (Table 2). Cereals, roots, and tubers were the most consumed food  
4  
5 groups (91.1%) and vitamin A was the least (22.4%) consumed food group (figure1).  
6  
7

8  
9 Table 2: Infant and young children feeding practice among children aged 6–23 months in Debre  
10  
11 Berhan Town, North Shewa Zone, Amhara Regional State, February 2018  
12  
13

| Variables (n=531)                          | Frequency N (%) |
|--------------------------------------------|-----------------|
| <b>Ever breastfeed</b>                     |                 |
| Yes                                        | 526 (99.1)      |
| No                                         | 5 (0.9)         |
| <b>Initiation of breastfeeding (n=526)</b> |                 |
| ≤ 1 hour                                   | 482 (91.6)      |
| ≥ 1 hours                                  | 44 (8.4)        |
| <b>Currently breastfeed (n=526)</b>        |                 |
| Yes                                        | 434 (82.5)      |
| No                                         | 92 (17.5)       |
| <b>Prelacteal feeding</b>                  |                 |
| Yes                                        | 9 (1.7)         |
| No                                         | 522 (97.3)      |
| <b>Bottle feeding</b>                      |                 |
| Yes                                        | 258 (48.6)      |
| No                                         | 273 (51.4)      |
| <b>Introduction of complementary food</b>  |                 |
| Yes                                        | 520 (97.9)      |

No 11 (2.1)

---

**Age of child complementary food initiated (520)**

<6 months 80 (15.1)

At 6 months 326 (61.4)

>6 months 114 (21.5)

---

**Milk feed for non-breastfed children (n=97)**

Receive at least 2 milk feed 57 (58.8)

Not receive 2 milk feed 40 (41.2)

---

**Meet minimum meal frequency**

Yes 290 (54.6)

No 241 (45.4)

---

**Meet minimum dietary diversity**

Yes 235 (44.3)

No 296 (55.7)

## Maternal and child health service utilization

The majority, 522 (98.3%) mothers were delivered their child at a health facility, and nearly two-thirds of mothers 350 (65.9%) had four or more antenatal care during pregnancy. One-quarter of infants and young children 6-23 months of age had a history of illness two weeks before the survey (Table 3).

Table 3: Maternal and child health service utilization in Debre Berhan, Ethiopia, 2018

---

| Variables | Frequency N (%) |
|-----------|-----------------|
|-----------|-----------------|

---

---

**Have focused antenatal care follow up during pregnancy**

|     |            |
|-----|------------|
| Yes | 350 (65.9) |
| No  | 181 (34.1) |

---

**Child growth monitoring service utilization**

|     |            |
|-----|------------|
| Yes | 250 (47.1) |
| No  | 281 (52.9) |

---

**Place of delivery**

|                 |            |
|-----------------|------------|
| Health facility | 522 (98.3) |
| Home            | 9 (1.7)    |

---

**Postnatal visit**

|     |            |
|-----|------------|
| Yes | 205 (38.6) |
| No  | 326 (61.4) |

---

**Family planning use**

|     |            |
|-----|------------|
| Yes | 438 (82.5) |
| No  | 93 (17.5)  |

---

**Received IYCF advice from HEWs**

|     |          |
|-----|----------|
| Yes | 186 (35) |
| No  | 345 (65) |

---

**Maternal history of illness 2 weeks before the survey**

|     |            |
|-----|------------|
| Yes | 44 (8.3)   |
| No  | 487 (91.7) |

---

**Child history of illness 2 weeks before the survey**

|     |            |
|-----|------------|
| Yes | 141(26.6)  |
| No  | 390 (73.4) |

---

## Prevalence of minimum acceptable diet

The prevalence of minimum acceptable diet was 31.6 % (95% CI: 27.7, 35.2). The proportion of female children who consumed MAD was higher compared with male children aged 6-23 months and two-fifths (40%) of infant and young children aged 18-23 months consumed minimum acceptable diet (Figure 2).

## Factors Associated with the minimum acceptable diet

After adjustment, mother and father higher level of education, increase child age, home garden practice, a child with no history of illness two weeks before the survey, focused ANC visits, participating in growth monitoring and promotion, and receiving IYCF advice were positively associated with MAD. Children whose mother attained secondary education had nearly five times (AOR=4.9, 95% CI: 1.3, 18.9) and college education were more than six times more likely to receive higher MAD (AOR=6.4, 95% CI: 1.5, 26.6). While children whose fathers attained primary education had more than three times greater odds of MAD (AOR=1.3, 95% CI: 1.5, 2.4). Similarly, children who were aged 12-17 were almost two times (AOR=1.8, 95% CI: 1.0, 3.4), and those who were aged 18-23 months were more than three times had higher odds of MAD compared with children aged 6-11 months. Mothers who attained four ANC visits were two times (AOR=2.0, 95% CI: 1.0, 3.9) more likely to offer MAD compared with mothers who had less than four ANC contact points. Likewise, mothers who participated in growth monitoring program nearly two times (AOR=1.8, 95% CI: 1.1, 2.9) more likely to provide MAD to their children than. Children who had no history of illness two weeks before the survey were nearly three times more likely to

get MAD (AOR=2.9, 95% CI:1.5, 6.0) than children with a history of illness. Children from the households with a home garden farming had more than two times higher odds of MAD (AOR=2.5, 95% CI: 1.5, 4.3) (Table 4). A two-factor product terms were used to test interaction effects between explanatory variables, but there were no interaction tests found significant.

Table 4: Factors associated with meeting minimum acceptable diet among children aged 6-23 months in Debre Berhan town, Amhara region, Ethiopia, 2018, (n=531)

| <b>Variables</b>                                                           | <b>Meet<br/>MAD N (%)</b> | <b>Not meet<br/>MAD N (%)</b> | <b>Crude OR<br/>(95% CI)</b> | <b>Adjusted OR<br/>(95%CI)</b> |
|----------------------------------------------------------------------------|---------------------------|-------------------------------|------------------------------|--------------------------------|
| <b>Household Food security</b>                                             |                           |                               |                              |                                |
| Food secure                                                                | 116(43.4)                 | 151 (56.6)                    | 3.13 (2.1, 4.6)              | 1.5 (0.85, 2.5)                |
| Food insecure                                                              | 52 (19.7)                 | 212 (80.3)                    | Reference                    | Reference                      |
| <b>Child Growth monitoring<br/>utilization</b>                             |                           |                               |                              |                                |
| Yes                                                                        | 102 (40.8)                | 148 (59.2)                    | 2.2 (1.5, 3.3)               | <b>1.8 (1.1, 2.9) *</b>        |
| No                                                                         | 66 (23.5)                 | 215 (76.5)                    | Reference                    | Reference                      |
| <b>Children having history of<br/>illness 2 weeks before the<br/>study</b> |                           |                               |                              |                                |
| Yes                                                                        | 16 (11.3)                 | 125 (88.7)                    | Reference                    | Reference                      |
| No                                                                         | 152 (39.0)                | 238 (61.0)                    | 4.99 (2.85, 8.72)            | <b>2.9 (1.5, 6.0) *</b>        |
| <b>Maternal education</b>                                                  |                           |                               |                              |                                |
| No formal education                                                        | 3 (4.7)                   | 61(95.3)                      | Reference                    | Reference                      |
| Primary                                                                    | 14 (10.2)                 | 123 (89.8)                    | 2.31 (0.64, 8.36)            | 0.1 (0.3, 4.5)                 |

1  
2  
3 Secondary 60 (38.7) 95 (61.3) 12.8(3.9,42.8) **4.9 (1.3, 18.9)**

4  
5 \*

6  
7  
8 College and above 91 (52.0) 84 (48.0) 22.0(6.7,72.9) **6.4 (1.5, 26.6)**

9  
10 \*

11  
12 **Head of household**

13  
14 Father only 68 (24.6) 208 (75.4) Reference Reference

15  
16 Mother only 11 (26.2) 31 (73.8) 1.08(0.52,2.3) 1.3 (0.4, 4.1)

17  
18 Both father and mother 89 (41.8) 124 (59.2) 2.2 (1.5, 3.2) 1.0 (0.6, 1.8)

19  
20  
21 **Child age (in completed**

22  
23 **months)**

24  
25 6-11 31 (17.7) 144 (82.3) Reference Reference

26  
27 12-17 64 (36.4) 112 (63.6) 2.65 (1.6,4.35) **1.8 (1.0, 3.4) \***

28  
29 18-23 73 (40.6) 107 (59.4) 3.2 (1.9,5.2) **2.2 (1.2, 3.9) \***

30  
31  
32 **Mother fruit consumption**

33  
34 **per week**

35  
36  $\geq 3$  times 139 (35.9) 248 (64.1) 2.2(1.4, 3.5) 1.3 (0.7, 2.3)

37  
38  $< 3$  times 29 (20.1) 115(79.9) Reference Reference

39  
40  
41 **The mother receives IYCF**

42  
43 **counseling from HEW**

44  
45 Yes 84 (45.2) 102 (54.8) 2.6 (1.8, 3.7) **2.4 (1.4, 3.9) \***

46  
47 No 84 (24.3) 261 (75.7) Reference Reference

48  
49  
50 **Presence of home garden**

51  
52 Yes 48 (44.4) 60 (55.6) 3.6 (2.3, 5.6) **2.5 (1.5, 4.3) \***

1  
2  
3  
4  
5  
6  
7  
8  
9  
10  
11  
12  
13  
14  
15  
16  
17  
18  
19  
20  
21  
22  
23  
24  
25  
26  
27  
28  
29  
30  
31  
32  
33  
34  
35  
36  
37  
38  
39  
40  
41  
42  
43  
44  
45  
46  
47  
48  
49  
50  
51  
52  
53  
54  
55  
56  
57  
58  
59  
60

|                                  |            |            |                 |                         |
|----------------------------------|------------|------------|-----------------|-------------------------|
| No                               | 108 (25.5) | 315 (74.5) | Reference       | Reference               |
| <b>Number of ANC visits</b>      |            |            |                 |                         |
| ≥4 ANC                           | 147 (42.0) | 203 (58.0) | 5.5 (3.3, 9.1)  | <b>2.0 (1.0, 3.9) *</b> |
| ≤3 ANC                           | 21 (11.6)  | 160 (88.4) | Reference       | Reference               |
| <b>Father level of education</b> |            |            |                 |                         |
| No formal education              | 8 (15.1)   | 45 (84.9)  | Reference       | Reference               |
| Primary education                | 33 (30.0)  | 77 (70.0)  | 2.6 (1.1, 6.1)  | <b>1.3 (1.5, 2.4)</b>   |
| Secondary education              | 39 (24.1)  | 123 (65.9) | 1.7(0.7, 3.9)   | 2.7 (0.7, 11.1)         |
| College &above                   | 88 (42.7)  | 118 (57.3) | 3.98 (1.8, 8.9) | 2.9 (0.7, 11.6)         |
| <b>Household wealth index</b>    |            |            |                 |                         |
| Poor                             | 43 (22.9)  | 145 (77.1) | Reference       | Reference               |
| Medium                           | 59 (33.1)  | 119 (66.9) | 1.7 (1.05,3.6)  | 0.9 (0.5, 1.8)          |
| Rich                             | 66 (40.0)  | 99 (60.0)  | 2.25 (1.4, 3.6) | 1.1 (0.6, 2.1)          |

\*Significant at P-value <0.05

## Discussion

### General findings

The objective of this study was to assess the prevalence of MAD and associated factors among children 6-23 months of age in the Amhara region, central Ethiopia. Our study results showed that the prevalence of MAD among children aged 6-23 months was 31.6%. The study also identified different factors associated with MAD; educational status, number of ANC visits during index child pregnancy, child growth monitoring and promotion utilization, age of a child, children free of illness two weeks before the survey, IYCF advice, and home garden were associated with MAD. Children whose parents attained formal education were positively associated with increasing



1  
2  
3 MAD. Children whose mother achieved secondary and college-level education had greater odds  
4 of MAD compared with children whose mother had no formal education. Likewise, children  
5  
6 whose fathers had primary education were more likely to receive higher odds of MAD than  
7  
8 children whose fathers had no formal education. A mother who attained four and above ANC visits  
9  
10 and those who participated in child growth monitoring and promotion programs were more likely  
11  
12 to provide MAD to her child. Children aged 12-17 and 18-23 months and those whose mother  
13  
14 received IYCF advice from HEWs had greater more odds of MAD compared with children aged  
15  
16 6-11 months and those whose mother didn't receive IYCF advice from HEWs. As well, children  
17  
18 from households have a home garden farming, and those who had no history of illness two weeks  
19  
20 before the study had higher odds of MAD. However, the study results should be interpreted with  
21  
22 caution because the study was used a cross-sectional study that doesn't establish a causal  
23  
24 relationship and it is conducted during post-harvest and pre-fasting seasons that may be associated  
25  
26 with improved child's consumption of diversified diets from animal and plant food sources.  
27  
28  
29  
30  
31  
32  
33

### 34 **Comparison with similar studies**

35  
36  
37 Previous studies assessed the prevalence of MAD and associated factors among children aged 6-  
38  
39 23 months. In our study, the prevalence of MAD was consistent with the analysis of the Gahanna  
40  
41 demographic survey (29.9%) and study from Nepal (33%) [27, 28]. However, the current finding  
42  
43 is lower than study reported in Indonesia (44.9%), China (41.6%), India (35.6%-37.7%) and  
44  
45 Bangladesh (39.9%) [13-15, 29, 30]. In contrast, the prevalence of MAD in the present study  
46  
47 greater than studies result in the Philippines (6.7%), Pakistan (8%), Nepal (26.5%), Uganda (23-  
48  
49 26.3 %), and Ethiopia (6.1%-7%) [11, 12, 17, 31-33]. The possible reasons for the variation may  
50  
51 be due to differences in a study setting, period, population, and sample size. Our study identified  
52  
53 factors associated with MAD that are consistent with similar studies done across the world. In line  
54  
55  
56  
57  
58  
59  
60

1  
2  
3 with the current study results, a similar study in Indonesia, Bangladesh, Ethiopia, Nepal, Ghana,  
4 and Tanzania established an affirmative association between parental educational status and  
5 improved consumption of MAD [13, 15, 16, 27, 28, 34]. Study in Nepal and Philippine showed  
6 that the number of ANC visits were positively associated with MAD [5, 11], and study in the urban  
7 Philippine and Ghana asserted that mother participation in child growth monitoring and promotion  
8 associated with improved child's dietary diversity and frequency of consumption [35, 36]. Also,  
9 study findings from Indonesia, Ghana, Uganda, and Pakistan demographic survey analysis  
10 asserted that children who were aged 12 to 17 and 18-23 months were more likely to have greater  
11 odds of MAD [13, 28, 33, 37]. A study in the agro-pastoral community of Ethiopia found that the  
12 provision of IYCF advice has a positive impact on the child feeding practice [38].  
13  
14  
15  
16  
17  
18  
19  
20  
21  
22  
23  
24  
25  
26

### 27 **Possible mechanisms**

28 Parent who attained formal education significantly increase the odds of minimum acceptable diet.  
29  
30 The possible mechanisms between the parents' higher level of education and improved minimum  
31 acceptable diet; an educated parent may have a good understanding about the significance of the  
32 recommended infant and young child feeding and easily adopt IYCF counseling and education  
33 services provided by health care providers. Furthermore, higher education achievement has a  
34 positive relationship with improved household income and household food security because  
35 educated parents may be employed in a better-paid job and this may increase their purchasing  
36 power of diversified and high-quality diet to their children. During ANC and child growth  
37 monitoring and promotion contact points, the mother/caregiver could receive optimal infants and  
38 young children feeding counseling that may increase the odds of minimum acceptable diet. The  
39 odds of MAD were higher among children who were aged 12-17 and 18-23 months. The possible  
40 reason for the association between greater odds of MAD and increasing age may be due to the  
41  
42  
43  
44  
45  
46  
47  
48  
49  
50  
51  
52  
53  
54  
55  
56  
57  
58  
59  
60

1  
2  
3 mother's perception of young children's stomach incompetent to digest solid or semi-solid diets.  
4  
5 Hence, the mother may introduce only a milk-based diet and start the introduction of diversified  
6  
7 solid and semi-solid diet after the child age reaches 12 months. Children who were illness-free  
8  
9 within two weeks before the survey and those who were lived in the household having a home  
10  
11 garden had greater odds of MAD. This is because illness reduces child appetite, dietary intake and  
12  
13 nutrient absorption lead to lower odds of MAD. On the other hand, home garden farming in  
14  
15 resource-limited settings positively associated with improved income, household food security,  
16  
17 and dietary diversity [39]. Thus, children who lived in higher income and food secure households  
18  
19 may receive age-appropriate feeding with different food groups. Besides, home garden farming  
20  
21 had a positive relationship with increased food availability and accessibility, and mothers may  
22  
23 provide their children with a variety of food groups.  
24  
25  
26  
27  
28

### 29 **Policy implication and future research**

31 The government of Ethiopia launched a revised national nutrition program (NNP II) to end child  
32  
33 malnutrition by the year 2030 and appropriate complementary feeding for children aged 6-23  
34  
35 months is one of the main intervention approaches of NNP II to hunger. However, the current  
36  
37 study findings indicated that less than one-third of children aged 6-23 months meet the minimum  
38  
39 acceptable diet, and several factors influence the provision of MAD. This denotes that children  
40  
41 aged 6-23 months at higher risk of growth failure, poor mental development, and adverse health  
42  
43 outcomes. Thus, the government of Ethiopia needs to strengthen existing nutrition programs and  
44  
45 strategies to increase the age-appropriate child feeding practices in the country. Also, the  
46  
47 government and other NGOs need to consider situation-specific nutrition interventions program to  
48  
49 improve the prevalence of minimum acceptable diet. More attention should be given to improve  
50  
51 the minimum acceptable diet for uneducated parents, the mother having fewer ANC visits and  
52  
53  
54  
55  
56  
57  
58  
59  
60

1  
2  
3 those who didn't participate in growth monitoring and promotion services, child feeding during  
4 illness, and encourage home garden farming practice. Parental educational status has a positive  
5 impact on the minimum acceptable diet. Similar studies affirmed that advanced educational status  
6 associated with improved health services utilization such as ANC and growth monitoring and  
7 promotion services utilization which in turn positively impact the provision of optimum infants  
8 and young children feeding practices [35, 40]. In 2003, the government of Ethiopia launched a  
9 health extension program to provide essential primary health care services to all people and begin  
10 to deploy community-based health workers called health extension workers and study in Ethiopia  
11 showed that health extension workers have a positive influence on the improvement of maternal  
12 and child health service utilization and health-seeking behaviors [41, 42]. Ultimately, nutrition  
13 information offer during health service utilization contact points may promote appropriate children  
14 feeding practice. Comprehensive nutrition education and counseling and a wide range of health  
15 service programs through community-based health workers, mother-to-mother support groups,  
16 religious leaders, and idea influencers should be strengthened to improve the provision of  
17 minimum acceptable diet in Ethiopia.  
18  
19  
20  
21  
22  
23  
24  
25  
26  
27  
28  
29  
30  
31  
32  
33  
34  
35  
36

37  
38 **Ethical Consideration:** Institutional Health Research Ethics Review Committee (IHRERC) of  
39 Haramaya University, College of Medicine and Health Sciences ethically approved the study  
40 with reference number C/Ac/R/D/01/878/18 and data were collected after informed written  
41 consent taken from study participant.  
42  
43  
44  
45  
46

47 **Patient consent for publication:** Not required

48  
49 **Data availability:** Data used to analyze this study are found from the corresponding author

50  
51 **Conflict of interest:** None declared  
52  
53  
54  
55  
56  
57  
58  
59  
60

1  
2  
3 **Funding statement:** This research received no specific grant from any funding agency in the  
4 public, commercial or not-for-profit sectors.  
5  
6

7 **Patient and public involvement:** Patients and/or the public were not involved in the design, or  
8 conduct, or reporting, or dissemination plans of this research.  
9  
10

11 **Author contributions:** AM: Conception and original draft writing, AM, GE, AS, BK, MA, LG,  
12 and AB: Study design, data analysis, and interpretation, GE, AS, BK, MA, LG, and AB: critically  
13 review initial draft and finalizing manuscript, AM and AS: preparing the manuscript. All authors  
14 reviewed and approved the final manuscript.  
15  
16  
17  
18  
19  
20  
21

22 **Acknowledgments:** We thank Haramaya University for giving us this opportunity. Our gratitude  
23 also goes to Debre Berhan Town Health Office, Kebeles administrators, and Health extension  
24 workers providing the necessary information.  
25  
26  
27  
28

## 29 **References**

- 30  
31  
32  
33 1. UNICEF, UNICEF's Approach to Scaling Up Nutrition for Mothers and their Children.  
34 2015.  
35
- 36  
37 2. WHO, Essential Nutrition Actions: improving maternal, newborn, infant and young child  
38 health and nutrition. World Health Organization, Geneva, Switzerland. 2013.  
39
- 40  
41 3. CARE, Infant and Young Child Feeding Practices: Collecting and Using Data: A Step-  
42 byStep Guide. Cooperative for Assistance and Relief Everywhere, Inc. (CARE). 2010.  
43 2010.  
44  
45  
46  
47
- 48  
49 4. USAID., USAID'S infant and young child nutrition project Ethiopia 2011  
50
- 51  
52 5. Kahlal, V., et al., Determinants of complementary feeding practices among Nepalese  
53 children aged 6–23 months: findings from demographic and health survey 2011. BMC  
54 pediatrics, 2013. 13(1): p. 131.  
55  
56  
57  
58  
59  
60

- 1  
2  
3 6. Huffman, S.L. and D. Schofield, Consequences of Malnutrition in Early Life and Strategies  
4 to Improve Maternal and Child Diets through Targeted Fortified Products. *Maternal &*  
5  
6 *Child Nutrition*, 2011. 7.  
7  
8
- 9  
10 7. Akombi, B.J., et al., Stunting, Wasting and Underweight in Sub-Saharan Africa: A  
11  
12 Systematic Review. *International Journal of Environmental Research and Public Health*,  
13  
14 2017. 14(863).  
15
- 16 8. Jones, A.D., et al., World Health Organization infant and young child feeding indicators  
17 and their associations with child anthropometry: a synthesis of recent findings. *Maternal &*  
18  
19 *child nutrition*, 2014. 10(1): p. 1-17.  
20  
21
- 22 9. WHO, Indicators for assessing infant and young child feeding practices Part 1; Definitions.  
23  
24 2008.  
25  
26
- 27 10. WHO, Indicators for assessing infant and young child feeding practices part 2:  
28  
29 measurement: World Health Organization. 2010.  
30  
31
- 32 11. Guirindola, M.O., et al., Determinants of Meeting the Minimum Acceptable Diet Among  
33  
34 Filipino Children Aged 6-23 Months. *Philippine Journal of Science*, 2018. 147 (1): p. 75-  
35  
36 89.  
37  
38
- 39 12. Tassew, A.A., et al., Factors affecting feeding 6–23 months age children according to  
40  
41 minimum acceptable diet in Ethiopia: A multilevel analysis of the Ethiopian Demographic  
42  
43 Health Survey. *PloS one*, 2019. 14(2): p. e0203098.  
44  
45
- 46 13. Ng, C.S., et al., Complementary feeding indicators and determinants of poor feeding  
47  
48 practices in Indonesia: a secondary analysis of 2007 Demographic and Health Survey data.  
49  
50 *Public health nutrition*, 2012. 15(5): p. 827-839.  
51  
52  
53  
54  
55  
56  
57  
58  
59  
60

- 1  
2  
3 14. Hipgrave, D.B., et al., Poor complementary feeding practices and high anaemia prevalence  
4 among infants and young children in rural central and western China. *European Journal of*  
5  
6  
7  
8  
9  
10  
11  
12  
13  
14  
15  
16  
17  
18  
19  
20  
21  
22  
23  
24  
25  
26  
27  
28  
29  
30  
31  
32  
33  
34  
35  
36  
37  
38  
39  
40  
41  
42  
43  
44  
45  
46  
47  
48  
49  
50  
51  
52  
53  
54  
55  
56  
57  
58  
59  
60  
14. Hipgrave, D.B., et al., Poor complementary feeding practices and high anaemia prevalence among infants and young children in rural central and western China. *European Journal of Clinical Nutrition* 2014. 68: p. 916-924.
15. Kabir, I., et al., Determinants of inappropriate complementary feeding practices in infant and young children in Bangladesh: secondary data analysis of Demographic Health Survey 2007. *Maternal & child nutrition*, 2012. 8: p. 11-27.
16. Mulat, E., et al., Uptake of minimum acceptable diet among children aged 6–23 months in orthodox religion followers during fasting season in rural area, DEMBECHA, north West Ethiopia. *BMC Nutrition*, 2019. 5(1): p. 18.
17. EDHS, ETHIOPIA Demographic and Health Survey TheDHS Program ICF Rockville, Maryland, USA, 2016.
18. Roba, K.T., et al., Anemia and undernutrition among children aged 6-23 months in two agroecological zones of rural Ethiopia. *Pediatric Health Med Ther*, 2016. 7: p. 131-140.
19. Derso, T., et al., Stunting, wasting and associated factors among children aged 6–24 months in Dabat health and demographic surveillance system site: A community based cross-sectional study in Ethiopia. *Bmc pediatrics*, 2017. 17(1): p. 96.
20. Mulat, E., et al., Uptake of minimum acceptable diet among children aged 6–23 months in orthodox religion followers during fasting season in rural area, DEMBECHA, north West Ethiopia. *BMC Nutrition* 2019. 5(18).
21. Dangura, D. and S. Gebremedhin, Dietary diversity and associated factors among children 6-23 months of age in Gorche district, Southern Ethiopia: Cross-sectional study. *BMC Pediatrics* 2017. 17(6): p. 2-7.

- 1
- 2
- 3 22. Mitchodigni, I.M., et al., Complementary feeding practices: determinants of dietary
- 4 diversity and meal frequency among children aged 6–23 months in Southern Benin. 2017.
- 5
- 6 9: p. 1117-1130.
- 7
- 8
- 9
- 10 23. Wondu, G.B. and N. Yang, Determinants of Suboptimal Complementary Feeding Practices
- 11 among Children Aged 6-23 Months in Selected Urban Slums of Oromia Zones (Ethiopia).
- 12
- 13 Journal of Nutrition & Food Sciences, 2017. 7(3): p. 1-10.
- 14
- 15
- 16
- 17 24. Coates, J., et al., Household Food Insecurity Access Scale (HFIAS) for Measurement of
- 18
- 19 Food Access: Indicator Guide: Food and Nutrition Technical Assistance 2007.
- 20
- 21
- 22 25. Saaka, M., et al., Magnitude and factors associated with appropriate complementary
- 23
- 24 feeding among children 6–23 months in Northern Ghana. BMC Nutrition 2016. 2(2).
- 25
- 26
- 27 26. von Elm E, et al., The Strengthening the Reporting of Observational Studies in
- 28
- 29 Epidemiology (STROBE) Statement: guidelines for reporting observational studies.
- 30
- 31 27. Gautam, K.P., et al., Determinants of infant and young child feeding practices in
- 32
- 33 Rupandehi, Nepal. BMC Research Notes, 2016. 9(135): p. 2-7.
- 34
- 35
- 36 28. Issaka, A.I., et al., Determinants of inadequate complementary feeding practices among
- 37
- 38 children aged 6–23 months in Ghana. Public Health Nutrition, 2014. 18(4): p. 669-678.
- 39
- 40 29. Ahmad, I., et al., Complementary feeding practices among children aged 6–23 months in
- 41
- 42 Aligarh, Uttar Pradesh. Journal of Family Medicine and Primary Care, 2017. 6(2): p. 386-
- 43
- 44 91.
- 45
- 46
- 47 30. Singhal, P., et al., Status of infant and young child feeding practices with special emphasis
- 48
- 49 on breast feeding in an urban area of Meerut. IOSR Journal of Dental and Medical
- 50
- 51 Sciences, 2013. 7(4): p. 7-11.
- 52
- 53
- 54
- 55
- 56
- 57
- 58
- 59
- 60



- 1  
2  
3 31. Khanal, V., et al., Determinants of complementary feeding practices among Nepalese  
4 children aged 6-23 months: findings from Demographic and Health Survey 2011. BMC  
5  
6  
7  
8  
9  
10  
11 32. Khan, G.N., et al., Determinants of infant and young child feeding practices by mothers in  
12 two rural districts of Sindh, Pakistan: a cross-sectional survey. International Breastfeeding  
13  
14  
15  
16  
17 33. Mokori, A., et al., Child factors associated with complementary feeding practices in  
18  
19  
20  
21  
22 34. Victor, R., et al., Factors associated with inappropriate complementary feeding practices  
23 among children aged 6–23 months in Tanzania. Maternal and Child Nutrition, 2012.  
24  
25  
26  
27 35. Gyampoh, S., et al., Child feeding knowledge and practices among women participating in  
28  
29  
30  
31  
32  
33 36. Cabalda, A.B., et al., Home gardening is associated with Filipino preschool children's  
34  
35  
36  
37  
38 37. Na, M., et al., Risk factors of poor complementary feeding practices in Pakistani children  
39  
40  
41  
42  
43  
44  
45 38. Liben, M.L., et al., Factors Associated with Dietary Diversity among Children of Agro  
46  
47  
48  
49  
50  
51  
52 39. Rammohan, A., et al., Home gardens as a predictor of enhanced dietary diversity and food  
53  
54  
55  
56  
57  
58  
59  
60

- 1  
2  
3 40. Ghosh-Jerath, S., et al., Ante natal care (ANC) utilization, dietary practices and nutritional  
4 outcomes in pregnant and recently delivered women in urban slums of Delhi, India: an  
5 exploratory cross-sectional study. *Reproductive health*, 2015. 12(1): p. 1-11.  
6  
7  
8  
9  
10 41. Medhanyie, A., et al., The role of health extension workers in improving utilization of  
11 maternal health services in rural areas in Ethiopia: a cross sectional study. *BMC health*  
12 *services research*, 2012. 12(1): p. 1-9.  
13  
14  
15  
16  
17 42. Assefa, Y., et al., Community health extension program of Ethiopia, 2003–2018: successes  
18 and challenges toward universal coverage for primary healthcare services. *Globalization*  
19 *and Health*, 2019. 15(1): p. 1-11.  
20  
21  
22  
23

### 24 **Figure legend**

25  
26  
27 Figure 1: Food groups consumed by infants and young children aged 6-23 months in Debre  
28 Berhan Town, Ethiopia, February 2018.  
29  
30

31  
32 Figure 2: MAD distribution by sex and age group of infant and young children aged 6-23 months  
33 in Debre Berhan Town, Ethiopia 2018  
34  
35  
36  
37  
38  
39  
40  
41  
42  
43  
44  
45  
46  
47  
48  
49  
50  
51  
52  
53  
54  
55  
56  
57  
58  
59  
60

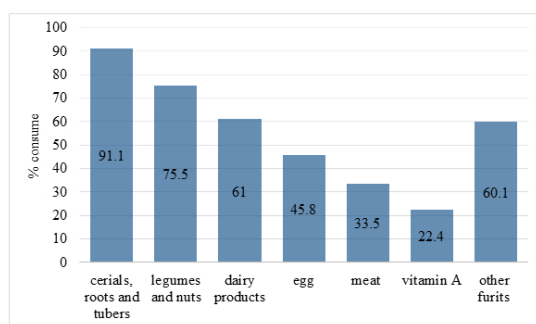

Food groups consumed by infants and young children aged 6-23 months in Debre Berhan Town, Ethiopia, February 2018

68x45mm (400 x 400 DPI)

1  
2  
3  
4  
5  
6  
7  
8  
9  
10  
11  
12  
13  
14  
15  
16  
17  
18  
19  
20  
21  
22  
23  
24  
25  
26  
27  
28  
29  
30  
31  
32  
33  
34  
35  
36  
37  
38  
39  
40  
41  
42  
43  
44  
45  
46  
47  
48  
49  
50  
51  
52  
53  
54  
55  
56  
57  
58  
59  
60

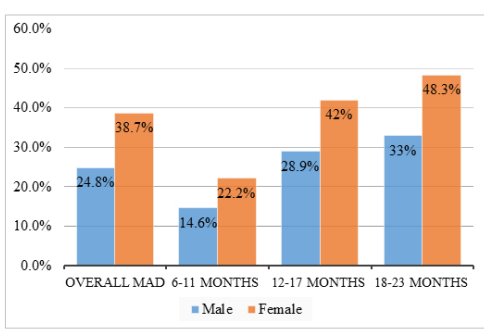

MAD distribution by sex and age group of infant and young children aged 6-23 months in Debre Berhan Town, Ethiopia 2018

68x45mm (400 x 400 DPI)

# Reporting checklist for cross sectional study.

Based on the STROBE cross sectional guidelines.

## Instructions to authors

Complete this checklist by entering the page numbers from your manuscript where readers will find each of the items listed below.

Your article may not currently address all the items on the checklist. Please modify your text to include the missing information. If you are certain that an item does not apply, please write "n/a" and provide a short explanation.

Upload your completed checklist as an extra file when you submit to a journal.

In your methods section, say that you used the STROBE cross sectional reporting guidelines, and cite them as:

von Elm E, Altman DG, Egger M, Pocock SJ, Gøtzsche PC, Vandenbroucke JP. The Strengthening the Reporting of Observational Studies in Epidemiology (STROBE) Statement: guidelines for reporting observational studies.

|                           |                     | Reporting Item                                                                                                                  | Page Number |
|---------------------------|---------------------|---------------------------------------------------------------------------------------------------------------------------------|-------------|
| <b>Title and abstract</b> |                     |                                                                                                                                 |             |
| Title                     | <a href="#">#1a</a> | Indicate the study's design with a commonly used term in the title or the abstract                                              | 1           |
| Abstract                  | <a href="#">#1b</a> | Provide in the abstract an informative and balanced summary of what was done and what was found                                 | 1&2         |
| <b>Introduction</b>       |                     |                                                                                                                                 |             |
| Background / rationale    | <a href="#">#2</a>  | Explain the scientific background and rationale for the investigation being reported                                            | 3 &4        |
| Objectives                | <a href="#">#3</a>  | State specific objectives, including any prespecified hypotheses                                                                | 4           |
| <b>Methods</b>            |                     |                                                                                                                                 |             |
| Study design              | <a href="#">#4</a>  | Present key elements of study design early in the paper                                                                         | 4           |
| Setting                   | <a href="#">#5</a>  | Describe the setting, locations, and relevant dates, including periods of recruitment, exposure, follow-up, and data collection | 4 & 5       |
| Eligibility criteria      | <a href="#">#6a</a> | Give the eligibility criteria, and the sources and methods of selection of participants.                                        | 5           |

|    |                     |                      |                                                                                                |
|----|---------------------|----------------------|------------------------------------------------------------------------------------------------|
| 1  |                     | <a href="#">#7</a>   | Clearly define all outcomes, exposures, predictors, potential confounders, and effect          |
| 2  |                     |                      | modifiers. Give diagnostic criteria, if applicable NA                                          |
| 3  |                     |                      |                                                                                                |
| 4  |                     |                      |                                                                                                |
| 5  | Data sources /      | <a href="#">#8</a>   | For each variable of interest give sources of data and details of methods of assessment        |
| 6  | measurement         |                      | (measurement). Describe comparability of assessment methods if there is more than one          |
| 7  |                     |                      | group. Give information separately for for exposed and unexposed groups if applicable. NA      |
| 8  |                     |                      |                                                                                                |
| 9  |                     |                      |                                                                                                |
| 10 | Bias                | <a href="#">#9</a>   | Describe any efforts to address potential sources of bias                                      |
| 11 |                     |                      |                                                                                                |
| 12 |                     |                      |                                                                                                |
| 13 | Study size          | <a href="#">#10</a>  | Explain how the study size was arrived at 5                                                    |
| 14 |                     |                      |                                                                                                |
| 15 | Quantitative        | <a href="#">#11</a>  | Explain how quantitative variables were handled in the analyses. If applicable, describe       |
| 16 | variables           |                      | which groupings were chosen, and why                                                           |
| 17 |                     |                      |                                                                                                |
| 18 |                     |                      |                                                                                                |
| 19 | Statistical methods | <a href="#">#12a</a> | Describe all statistical methods, including those used to control for confounding 7            |
| 20 |                     |                      |                                                                                                |
| 21 | Statistical methods | <a href="#">#12b</a> | Describe any methods used to examine subgroups and interactions NA                             |
| 22 |                     |                      |                                                                                                |
| 23 |                     |                      |                                                                                                |
| 24 | Statistical methods | <a href="#">#12c</a> | Explain how missing data were addressed 5                                                      |
| 25 |                     |                      |                                                                                                |
| 26 | Statistical methods | <a href="#">#12d</a> | If applicable, describe analytical methods taking account of sampling strategy                 |
| 27 |                     |                      |                                                                                                |
| 28 | Statistical methods | <a href="#">#12e</a> | Describe any sensitivity analyses NA                                                           |
| 29 |                     |                      |                                                                                                |
| 30 |                     |                      |                                                                                                |
| 31 | <b>Results</b>      |                      |                                                                                                |
| 32 |                     |                      |                                                                                                |
| 33 | Participants        | <a href="#">#13a</a> | Report numbers of individuals at each stage of study—eg numbers potentially eligible,          |
| 34 |                     |                      | examined for eligibility, confirmed eligible, included in the study, completing follow-up, and |
| 35 |                     |                      | analysed. Give information separately for for exposed and unexposed groups if applicable.      |
| 36 |                     |                      | NA                                                                                             |
| 37 |                     |                      |                                                                                                |
| 38 |                     |                      |                                                                                                |
| 39 |                     |                      |                                                                                                |
| 40 | Participants        | <a href="#">#13b</a> | Give reasons for non-participation at each stage NA                                            |
| 41 |                     |                      |                                                                                                |
| 42 | Participants        | <a href="#">#13c</a> | Consider use of a flow diagram NA                                                              |
| 43 |                     |                      |                                                                                                |
| 44 |                     |                      |                                                                                                |
| 45 | Descriptive data    | <a href="#">#14a</a> | Give characteristics of study participants (eg demographic, clinical, social) and information  |
| 46 |                     |                      | on exposures and potential confounders. Give information separately for exposed and            |
| 47 |                     |                      | unexposed groups if applicable. 8-10                                                           |
| 48 |                     |                      |                                                                                                |
| 49 |                     |                      |                                                                                                |
| 50 | Descriptive data    | <a href="#">#14b</a> | Indicate number of participants with missing data for each variable of interest NA             |
| 51 |                     |                      |                                                                                                |
| 52 |                     |                      |                                                                                                |
| 53 | Outcome data        | <a href="#">#15</a>  | Report numbers of outcome events or summary measures. Give information separately for          |
| 54 |                     |                      | exposed and unexposed groups if applicable. NA                                                 |
| 55 |                     |                      |                                                                                                |
| 56 |                     |                      |                                                                                                |
| 57 |                     |                      |                                                                                                |
| 58 |                     |                      |                                                                                                |
| 59 |                     |                      |                                                                                                |
| 60 |                     |                      |                                                                                                |

|    |                    |                      |                                                                                                  |
|----|--------------------|----------------------|--------------------------------------------------------------------------------------------------|
| 1  | Main results       | <a href="#">#16a</a> | Give unadjusted estimates and, if applicable, confounder-adjusted estimates and their            |
| 2  |                    |                      | precision (eg, 95% confidence interval). Make clear which confounders were adjusted for and      |
| 3  |                    |                      | why they were included 10-12                                                                     |
| 4  |                    |                      |                                                                                                  |
| 5  |                    |                      |                                                                                                  |
| 6  | Main results       | <a href="#">#16b</a> | Report category boundaries when continuous variables were categorized                            |
| 7  |                    |                      |                                                                                                  |
| 8  |                    |                      |                                                                                                  |
| 9  | Main results       | <a href="#">#16c</a> | If relevant, consider translating estimates of relative risk into absolute risk for a meaningful |
| 10 |                    |                      | time period NA                                                                                   |
| 11 |                    |                      |                                                                                                  |
| 12 | Other analyses     | <a href="#">#17</a>  | Report other analyses done—e.g., analyses of subgroups and interactions, and sensitivity         |
| 13 |                    |                      | analyses NA                                                                                      |
| 14 |                    |                      |                                                                                                  |
| 15 |                    |                      |                                                                                                  |
| 16 | <b>Discussion</b>  |                      |                                                                                                  |
| 17 |                    |                      |                                                                                                  |
| 18 |                    |                      |                                                                                                  |
| 19 | Key results        | <a href="#">#18</a>  | Summarise key results with reference to study objectives 13-16                                   |
| 20 |                    |                      |                                                                                                  |
| 21 | Limitations        | <a href="#">#19</a>  | Discuss limitations of the study, taking into account sources of potential bias or imprecision.  |
| 22 |                    |                      | Discuss both direction and magnitude of any potential bias. 16                                   |
| 23 |                    |                      |                                                                                                  |
| 24 |                    |                      |                                                                                                  |
| 25 | Interpretation     | <a href="#">#20</a>  | Give a cautious overall interpretation considering objectives, limitations, multiplicity of      |
| 26 |                    |                      | analyses, results from similar studies, and other relevant evidence. 13                          |
| 27 |                    |                      |                                                                                                  |
| 28 |                    |                      |                                                                                                  |
| 29 | Generalisability   | <a href="#">#21</a>  | Discuss the generalisability (external validity) of the study results 16                         |
| 30 |                    |                      |                                                                                                  |
| 31 | <b>Other</b>       |                      |                                                                                                  |
| 32 |                    |                      |                                                                                                  |
| 33 | <b>Information</b> |                      |                                                                                                  |
| 34 |                    |                      |                                                                                                  |
| 35 | Funding            | <a href="#">#22</a>  | Give the source of funding and the role of the funders for the present study and, if applicable, |
| 36 |                    |                      | for the original study on which the present article is based 16                                  |
| 37 |                    |                      |                                                                                                  |
| 38 |                    |                      |                                                                                                  |

39 None The STROBE checklist is distributed under the terms of the Creative Commons Attribution License CC-BY. This checklist can be  
 40 completed online using <https://www.goodreports.org/>, a tool made by the [EQUATOR Network](#) in collaboration with [Penelope.ai](#)  
 41  
 42  
 43  
 44  
 45  
 46  
 47  
 48  
 49  
 50  
 51  
 52  
 53  
 54  
 55  
 56  
 57  
 58  
 59  
 60
